# Supplementary material for: Technology adoption and implementation in organisations: comparative case studies of 12 English NHS Trusts
Source: PubMed Central journal article supplement — BMJ Open. 2012 Apr 4;2(2):e000872. doi: 10.1136/bmjopen-2012-000872 (PMC3329608; doi:10.1136/bmjopen-2012-000872), 2012-04-04
Supplement: bmjopen-2012-000872.draft_revisions.pdf [file bmjopen-2012-000872.draft_revisions.pdf]

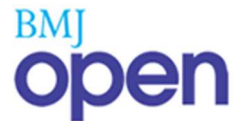

**How evidence matters in adopting innovative technologies –  
comparative case studies of 12 English NHS Trust**

|                                 |                                                                                                                                                                                                                                                                                                                                                                             |
|---------------------------------|-----------------------------------------------------------------------------------------------------------------------------------------------------------------------------------------------------------------------------------------------------------------------------------------------------------------------------------------------------------------------------|
| Journal:                        | <i>BMJ Open</i>                                                                                                                                                                                                                                                                                                                                                             |
| Manuscript ID:                  | bmjopen-2012-000872                                                                                                                                                                                                                                                                                                                                                         |
| Article Type:                   | Research                                                                                                                                                                                                                                                                                                                                                                    |
| Date Submitted by the Author:   | 12-Jan-2012                                                                                                                                                                                                                                                                                                                                                                 |
| Complete List of Authors:       | Kyratsis, Yiannis; Imperial College London, National Centre for Infection Prevention and Management, Faculty of Medicine<br>Ahmad, Raheelah; Imperial College London, National Centre for Infection Prevention and Management, Faculty of Medicine<br>Holmes, Alison; Imperial College London, National Centre for Infection Prevention and Management, Faculty of Medicine |
| <b>Primary Subject Heading</b>: | Health services research                                                                                                                                                                                                                                                                                                                                                    |
| Secondary Subject Heading:      | Evidence based practice, Health policy, Infectious diseases, Qualitative research, Sociology                                                                                                                                                                                                                                                                                |
| Keywords:                       | HEALTH SERVICES ADMINISTRATION & MANAGEMENT, Change management < HEALTH SERVICES ADMINISTRATION & MANAGEMENT, Organisation of health services < HEALTH SERVICES ADMINISTRATION & MANAGEMENT, Organisational development < HEALTH SERVICES ADMINISTRATION & MANAGEMENT, Health policy < HEALTH SERVICES ADMINISTRATION & MANAGEMENT, Infection control < INFECTIOUS DISEASES |
|                                 |                                                                                                                                                                                                                                                                                                                                                                             |

SCHOLARONE™  
Manuscripts

1  
2  
3 **How evidence matters in adopting innovative technologies – comparative case studies of 12 English**

4  
5 **NHS Trusts**

6  
7  
8  
9 **Dr Yiannis Kyratsis** (corresponding author)

10  
11 Research Fellow, National Centre for Infection Prevention and Management

12  
13 Faculty of Medicine, Imperial College London

14  
15 Level 2 Infection Control, Hammersmith House, Hammersmith Hospital campus

16  
17 Du Cane Road, W12 0HS, London, United Kingdom

18  
19 Email: [y.kyratsis@imperial.ac.uk](mailto:y.kyratsis@imperial.ac.uk)

20  
21  
22  
23 Tel: 0044 20 8383 3277; Fax: 0044 20 8383 3235

24  
25  
26  
27 **Dr Raheelah Ahmad**

28  
29 Research Associate, National Centre for Infection Prevention and Management

30  
31 Faculty of Medicine, Imperial College London, United Kingdom

32  
33 Level 2 Infection Control, Hammersmith House, Hammersmith Hospital campus

34  
35 Du Cane Road, W12 0HS, London, United Kingdom

36  
37  
38  
39 **Professor Alison Holmes**

40  
41 Professor in Infectious Diseases & Director of Infection Prevention and Control

42  
43 National Centre for Infection Prevention and Management

44  
45 Faculty of Medicine, Imperial College London, United Kingdom

46  
47 Level 2 Infection Control, Hammersmith House, Hammersmith Hospital campus

48  
49 Du Cane Road, W12 0HS, London, United Kingdom

50  
51  
52  
53  
54  
55 **Keywords:** innovation adoption, technology, infection prevention, evidence **Word count: 4,435**

**ABSTRACT**

**Objectives:** To understand organisational technology adoption by looking at the different types of innovation knowledge used during the process.

**Design:** Qualitative, multi-site, comparative case study design.

**Setting:** One primary care and 11 acute care organisations (trusts) across all health regions in England in the context of infection prevention and control.

**Participants and data analysis:** 121 semi-structured individual and group interviews with 109 informants, involving clinical and non-clinical staff from all organisational levels and various professional groups. Documentary evidence and field notes were also used. 38 technology adoption processes were analysed using an integrated approach combining inductive and deductive reasoning.

**Main findings:** Decision makers variably accessed three types of innovation knowledge during the technology adoption process: *'awareness'* (knowledge that an innovation exists), *'principles'* (knowledge about an innovation's functioning principles), and *'how-to'* (knowledge required to use an innovation properly). Centralised (national, government-led) and local sources were used to obtain this knowledge. Decentralised professional networks were preferred sources for all three types of knowledge. Overall, less attention was given to *'how-to'* compared to *'principles'* knowledge at the early stages of the process, which contributed to 12 cases of incomplete implementation or discontinuance after initial adoption. The leadership style and the professional background of key decision makers influenced this asymmetric attention to different types of innovation knowledge.

**Conclusions:** Potential adopters and change agents often overlooked or undervalued *'how-to'* knowledge. Balancing *'principles'* and *'how-to'* knowledge early in the innovation process enhanced successful technology adoption and implementation by considering efficacy as well as strategic,

1  
2  
3 structural and cultural fit with the trust's context. This learning is critical given the policy emphasis for  
4  
5 organisations to be innovation-ready.  
6  
7

8 **Word count: 269 (word limit 300 words)**  
9

10  
11  
12  
13  
14 **ARTICLE SUMMARY**  
15

16  
17  
18 **Article focus**

- 19  
20  
21  
22  
23  
24  
25  
26  
27  
28  
29  
30
- Despite policy support and the development of a dedicated evidence dissemination infrastructure in the NHS, why is technology adoption and implementation still a challenge?
  - We need to understand better *how* the innovation process unfolds in organisations to build on what we know about individual behaviours. In particular, how the use of different types of knowledge about an innovation impacts decision making.

31  
32  
33 **Key messages**

- 34  
35  
36  
37  
38  
39  
40  
41  
42  
43  
44  
45  
46  
47  
48  
49  
50  
51  
52  
53  
54  
55  
56  
57  
58  
59  
60
- In our study, centralised dissemination of evidence had minimal to moderate impact on organisational innovation decisions. Practice-based, peer-mediated, and local dissemination systems were perceived more relevant.
  - When '*how-to*' knowledge was undervalued and considered late, important strategic, structural, and cultural elements of the trust's context were overlooked. This had negative implications for technology adoption and implementation.
  - Professional backgrounds and leadership styles influenced the types of innovation knowledge considered by decision makers. The involvement of diverse professionals in decision making improves the chances of successful implementation through a balanced consideration of the strength of scientific evidence and practical application.

**Strengths and limitations**

- The scale of the study, its real time and longitudinal nature provide a rich dataset. Our study is theory driven and comprises multi-site, comparative case studies, which enhance the generalisability of findings beyond the context of the studied trusts.
- We explicitly studied cases of non-adoption and discontinuation after initial adoption to provide important learning, often missing from innovation diffusion research.
- On limitations, we were not able to follow implementation past the end of August 2010 and therefore do not have information on routinised use of the implemented technologies.

## INTRODUCTION

The recent focus by policy makers on quality and efficiency in healthcare<sup>1</sup>, highlight the need to harness new healthcare technologies and innovation to improve quality of patient care and health system productivity<sup>2 3</sup>. The uptake and implementation of new technologies in healthcare has often proved challenging and in some cases very slow<sup>4-6</sup>. In the UK the significant 'research to practice' knowledge gap and the suboptimal implementation of new ideas and technologies into clinical practice have been emphasised in several recent policy documents<sup>7-9</sup>. Policy and academic systematic reviews<sup>6 10</sup> consistently show that there remains a poor understanding of the mechanisms and processes that encourage the adoption of new interventions. Specifically, attention to the processes by which organisational members access and use implementation and clinical evidence during decision making is required<sup>9 11 12</sup>. As regards technology adoption in the National Health Service (NHS) a recent systematic review<sup>13</sup> has found that there has been little research in this area.

In the last decade government funded agencies have been created to encourage innovative thinking across the NHS and promote the use of evidence-based innovations; such predominately centralised evidence dissemination structures include the NHS Institute for Innovation and Improvement, the National Institute for Health and Clinical Excellence (NICE) with the launch of the NHS Evidence online portal, and the NHS Technology Adoption Centre, which works to speed-up the adoption of proven technologies by NHS organisations. Despite these initiatives, the challenges of adopting novel technologies in the NHS persist.

Our study addresses this research gap and is well grounded in innovation change and diffusion theories<sup>14-16</sup>. Specifically, our study unpacks the innovation processes in organisations - in contrast to individuals - by investigating in detail the interplay between the types and sources of innovation

1  
2  
3 knowledge used. We empirically focus our investigation on infection prevention & control (IPC) as it  
4 represents a cross-cutting priority area in healthcare with application to primary and acute care, surgery  
5 and medicine alike. While there has been increasing public and policy attention to address healthcare  
6 associated infections (Box 1) the uptake and implementation of new technologies in IPC varies and in  
7 some cases is slow<sup>17</sup>. This empirical setting, therefore, offers opportunities to generate transferrable  
8 lessons.  
9  
10  
11  
12  
13  
14  
15  
16  
17  
18  
19

### 20 **Box 1 Healthcare associated infections initiatives in the NHS**

21  
22 Healthcare associated infections (HCAIs) are a worldwide problem causing high mortality and morbidity  
23 with significant cost implications for health systems.<sup>18-23</sup> Both developing and more developed  
24 countries face the challenge<sup>19</sup> and there is intense media and public attention on the issue. In the UK a  
25 range of infection prevention and control policies have been introduced to help tackle the problem,  
26 including legislation, performance targets, and clinical guidelines. In England the reporting of Meticillin-  
27 resistant *Staphylococcus aureus* (MRSA) bloodstream infections and *Clostridium difficile* (*C.*  
28 *difficile*)infections are mandatory and there are national and local targets for reduction as well as  
29 national evidence-based guidelines.<sup>24</sup> The development of effective technology interventions to  
30 complement good infection control practice is viewed as central to tackling HCAIs and a range of  
31 evidence-based innovations have been developed. Government funded programmes, such as the  
32 Department of Health 'HCAI Technology Innovation Programme'<sup>17</sup> have been created to fast track the  
33 innovation process. Programme work-streams span development to procurement and implementation  
34 processes and include: 'Smart Ideas', 'Design Bugs Out', 'Smart Solutions', 'Product Surgeries' and  
35 'Showcase Hospitals', the latter focusing on the in-use value of HCAI technologies. In addition, the  
36 Health Protection Agency (HPA) Rapid Review Panel (RRP) was set up in 2004 to review new HCAI-  
37 related technologies providing a prompt assessment of new and novel equipment, materials, and other  
38  
39  
40  
41  
42  
43  
44  
45  
46  
47  
48  
49  
50  
51  
52  
53  
54  
55  
56  
57  
58  
59  
60

1  
2  
3 products or protocols that may be of value to the NHS to help reduce HCAI rates; recommendation  
4  
5 statements about the novel products are given to suppliers and NHS bodies ('Recommendation 1'  
6  
7 being the highest, encouraging adoption by the NHS).  
8  
9

## 10 11 12 13 14 15 **METHODS**

### 16 17 **Design and theoretical approach**

18  
19 This article reports on findings from a larger innovation adoption study in the area of HCAIs  
20  
21 commissioned by the Department of Health (DH)<sup>25</sup>. We employed a multiple case study research design  
22  
23 to build theory inductively<sup>26</sup> covering the decision making, procurement, and implementation processes  
24  
25 by NHS organisations when introducing innovative technologies. We undertook comparative case  
26  
27 studies<sup>27</sup> across 12 NHS trusts in England with each trust and technology adoption decisions as units of  
28  
29 analysis. Guided by our study's research aims we employed interpretive methods of inquiry which are  
30  
31 particularly suited in studies where the task is the description, interpretation, and explanation of a  
32  
33 phenomenon rather than estimation of its prevalence.<sup>28</sup>  
34  
35  
36  
37  
38  
39

40  
41 Damanpour and Schneider<sup>14</sup> suggest that the process of innovation adoption in organisations can be  
42  
43 divided into three broad phases of 'pre-adoption', 'adoption decision' and 'post-adoption', also referred  
44  
45 to in the literature as 'initiation', 'adoption (decision)', and 'implementation'<sup>15,14, 27</sup>. The adoption is  
46  
47 viewed as a process in which an organisation analyses the potential benefits and negative aspects of an  
48  
49 innovation on the basis of gathered knowledge. During this process three types of innovation knowledge  
50  
51 are important in moving potential adopters from 'ignorance' through awareness, attitude formation,  
52  
53 evaluation and on to adoption – *"the decision to make full use of the innovation as the best course of*  
54  
55 *action available"*<sup>15</sup>.  
56  
57  
58  
59  
60



1. Awareness knowledge – the awareness that an innovation exists and knowledge of its key properties.
2. How-to knowledge – the information necessary to use an innovation properly.
3. Principles knowledge – information dealing with the functioning principles underlying how the innovation works.

### Sampling and settings

The sample of organisations (NHS trusts) was predefined with one attribute in common as recipients of DH's 'HCAI Technology Innovation Award for outstanding contributions to fighting infections 2009'. The study comprised one primary and 11 acute care trusts, across all 10 Strategic Health Authorities (SHAs) in England. The trusts included in the study sample were diverse in geography, size and type (Table 1).

**Table 1 Case study sites characteristics**

| Trust | Trust type     | Number of beds | Population covered (m) | Financial turnover (m) | Number of sites | DIPC profession | Number of technologies adopted |
|-------|----------------|----------------|------------------------|------------------------|-----------------|-----------------|--------------------------------|
| T1    | S, PFI         | 1,269          | 0.75                   | £400                   | Multi-site      | Medical Doctor  | 1                              |
| T2    | S, F, PFI      | 754            | 0.34                   | £156                   | Multi-site      | Medical Doctor  | 6                              |
| T3    | T, U           | 1,902          | 1 (S)<br>3 (T)         | £652                   | Multi-site      | Medical Doctor  | 1                              |
| T4    | T, U, (PFI)    | 988            | 0.5 (S)<br>1.5 m (T)   | £420                   | Multi-site      | Medical Doctor  | 3                              |
| T5    | T, U, F, (PFI) | 2,068          | 0.5 (S)<br>1.7 (T)     | £648                   | Multi-site      | Medical Doctor  | 3                              |
| T6    | S, PFI         | 1,095          | 0.6                    | £430                   | Multi-site      | Medical Doctor  | 2                              |
| T7    | S, F, (PFI)    | 602            | 0.35                   | £200                   | One site        | Medical Doctor  | 4                              |
| T8*   | T, U, F        | 807            | 0.33 (S)<br>1.5 (T)    | £250                   | One site        | Nurse           | 3                              |
| T9    | T, F, (PFI), U | 1,150          | 0.12 (S)<br>1 m (T)    | £440                   | Multi-site      | Nurse           | 3                              |

|      |         |        |                    |                      |            |                |   |
|------|---------|--------|--------------------|----------------------|------------|----------------|---|
| T10  | S, (U)  | 974    | 0.6                | £415                 | Multi-site | Medical Doctor | 4 |
| T11* | T, U, F | 802    | 0.3 (S)<br>1.5 (T) | £400                 | Multi-site | Nurse          | 3 |
| T12* | P / I   | 76 (I) | 0.43               | £202 (P)<br>£744 (S) | Multi-site | Nurse          | 5 |

*P: primary, I: intermediate care, S: secondary, T: tertiary, U: university, F: foundation, PFI: private finance initiative, DIPC: Director of Infection Prevention & Control*

*\* Each of these trusts received £50K as the award was split across the health economy whilst the remainder trusts each received £150K*

### Data collection and participants

We collected data from secondary sources to provide a historical dimension to better situate the studied decision making processes. We gathered publicly available NHS trust documents and internal documents provided by the trusts, including the trusts' organisational and IPC team structures, infection control committee meeting minutes, infection control reports, business cases, minutes from board meetings related to the Innovation Award, local press articles, and trust newsletters.

Data from primary sources comprised 121 semi-structured individual and group interviews (July 2009 - August 2010). We conducted 85 individual interviews and group interviews with 36 informants. 12 informants were interviewed more than once. Within each of the trust sites we purposively sampled a diverse range of informants involved in the technology adoption or implementation, reflecting various perspectives, professional and organisational roles. Our participants included clinical and non-clinical managers, members of trusts' executive boards, health professionals - infection control nurses, matrons, infection control doctors, consultants, clinical biochemists, clinical microbiologists, and staff from domestic services, estates and facilities.

1  
2  
3 Interviews lasted on average an hour and explored individuals' perceptions, experiences, and views on  
4 the technology selection decisions, procurement and implementation processes. In the first visit the  
5 ongoing decision making process was captured and in the follow up visits the technology selection  
6 outcome and implementation experiences were explored for each trust. Field notes were taken, as well  
7 as summary notes from participation in meetings in which the technologies were discussed, and by  
8 observing the selected technologies in use. Data collection at each site continued until all aspects of the  
9 decision process had been accounted for by a diverse sample of informants. The data collection periods  
10 and sample varied by study site, depending on the scale of technology deployment.  
11  
12  
13  
14  
15  
16  
17  
18  
19  
20  
21  
22  
23

#### 24 **Data analysis**

25  
26 We analysed data using an integrated approach<sup>29</sup>. We combined an inductive "ground up" development  
27 of codes with a deductive organising conceptual framework for the adoption of complex health  
28 innovations to generate a "star-up list"<sup>29</sup>. This framework has been previously employed to understand  
29 multi-level innovation adoption<sup>30</sup>. Data analysis was conducted in parallel to ongoing data collection to  
30 feed emerging findings and 'test' these in subsequent interviews. The Qualitative Data Analysis  
31 computer software package N-Vivo 8 (QSR International) was used to systematically code the data and  
32 assist analysis, especially in cataloguing and linking concepts and codes. In line with recommendations  
33 by qualitative methodologists<sup>31-33</sup> authors 1 and 2 independently coded all data. The three authors met  
34 to review discrepancies<sup>29</sup>, enhancing internal validity<sup>33-35</sup>. Comparative cases were analysed in two  
35 stages: first each of the technologies within each trust, producing individual trust case studies; second a  
36 comparative analysis across the trusts. Summary tables were used to simultaneously compare several  
37 categories and dimensions of the data, helping us to reduce the volume of primary data and to make  
38 analytical inferences by comparing and contrasting. Pairs of cases as well as group of cases were  
39 compared by listing similarities and differences<sup>26</sup>.  
40  
41  
42  
43  
44  
45  
46  
47  
48  
49  
50  
51  
52  
53  
54  
55  
56  
57  
58  
59  
60

## MAIN FINDINGS

### The organisational innovation process and outcomes

Of the 38 organisational technology adoption decisions made during the period of the study, 22 technologies were successfully adopted and implemented, whilst 12 were discontinued after initial adoption or only partially implemented (Table 3). There was no clear outcome within the timeframe of the study for four technologies. Our empirical findings suggest that each of the three broad phases (pre-adoption, adoption decision, post-adoption) consisted of sub-stages. Most informants reported that they went through a series of evaluations, choices and actions over time as the adopting trusts principally engaged in a problem solving exercise. These involved: identifying a need in an IPC service area, considering or becoming aware of potentially useful technologies, searching for and evaluating available 'evidence', tentatively accepting, trialling, procuring, renegotiating, rejecting, (continuously) using the technologies considered. The process was dynamic, iterative and not always linear. We found that the majority of technology decisions were led by a perceived need - an area of priority in IPC had been identified by trusts first, and then relevant technologies were sought ('need pull'). A minority of technology adoption decisions were characterised by selecting a technology in the first instance and exploring how this might fit with strategic plans and service needs ('technology push').

### Use of innovation knowledge in the process

During the 'adoption decision' stage all trusts carried out systematic pre-adoption evaluations of the evidence related to the technologies prior to committing to procurement, with nine trusts trialling the technologies. Trusts variably accessed and prioritised the three types of knowledge about the technologies. Under 'awareness' knowledge the trusts considered the range of technologies available to address a particular problem, as well as key features and potential cost implications of such

1  
2  
3 technologies. In seeking '*principles*' knowledge the trusts sought primarily evidence of the technologies'  
4 technical efficacy based on the scientific principles behind the technology. They assessed the validity of  
5 claims made by commercial suppliers. In the '*how-to*' knowledge the trusts sought knowledge about the  
6 practical application of the technologies in local healthcare settings. This included users' experience with  
7 the technologies, aesthetics, functionality, as well as compatibility with strategic, structural and cultural  
8 elements of the trust's context. A more detailed estimation of the short-term and long-term associated  
9 costs also constituted '*how-to*' knowledge. In the setting of a healthcare organisation the '*how-to*'  
10 knowledge comprised a much broader, multi-dimensional definition compared to a simpler definition  
11 when the potential user is an individual<sup>15</sup>.  
12  
13  
14  
15  
16  
17  
18  
19  
20  
21  
22  
23  
24  
25

26 All trusts assessed the *costs*. Those trusts which spent little time in assessing '*how-to*' knowledge  
27 omitted important considerations such as long-term and running costs of a given technology. All trusts  
28 also made an assessment of the *effectiveness* of the technologies. The definition of *effectiveness* was  
29 broader when both '*principles*' and '*how-to*' knowledge were given sufficient attention and this ranged  
30 from local opinion including patient perceptions, ease of use by staff, to experimental controlled trials  
31 data. The majority of informants from all trusts noted that no particular technology could be solely or  
32 directly attributable to reducing HCAs and impact was attributable to ongoing multifaceted approaches.  
33  
34  
35  
36  
37  
38  
39  
40  
41  
42  
43  
44

#### 45 **Centralised and local dissemination of innovation knowledge**

46  
47 Decision makers used a wide range of *sources* to get information on the three types of innovation  
48 knowledge (Table 2). Peer review journals and commercial suppliers were used in all trusts to source  
49 '*principles*' knowledge. Supplier information was reported as compact and easy to access for  
50 practitioners, however this source was viewed as less credible. Of the government-funded centralised  
51 evidence dissemination structures, DH Showcase Hospitals Programme was widely used by trusts for  
52  
53  
54  
55  
56  
57  
58  
59  
60

obtaining 'awareness' and 'how-to' knowledge but none of the trusts used it for 'principles' knowledge. Local expert advice was preferred to the dedicated central expert panel (RRP) for obtaining 'principles' knowledge, while guidelines were used by only three trusts. Professional networks consistently featured amongst the top sources for all three types of innovation knowledge. The latter were used to exchange experiences on the use of the same or similar technologies, spreading information horizontally via networks of peers and local experts.

**Table 2 Type and sources of innovation knowledge used in the technology adoption process per trust**

| Types of Innovation Knowledge<br>Sources of Innovation Knowledge | Awareness Knowledge:<br>Identify technologies available to specific IPC priority areas & information about the nature of these technologies | Principles Knowledge:<br>why and how a technology works in terms of the underlying scientific principles or theory | 'How to' Knowledge:<br>how to put the technology in use, including issues of compatibility with trust structures / strategy / culture & issues of sustainability |
|------------------------------------------------------------------|---------------------------------------------------------------------------------------------------------------------------------------------|--------------------------------------------------------------------------------------------------------------------|------------------------------------------------------------------------------------------------------------------------------------------------------------------|
| Professional networks / other NHS trusts                         | n=11                                                                                                                                        | n=7                                                                                                                | n=10                                                                                                                                                             |
| Peer review journals                                             | n=2                                                                                                                                         | n=12                                                                                                               | -                                                                                                                                                                |
| Hospitals outside UK                                             | n=1                                                                                                                                         | -                                                                                                                  | -                                                                                                                                                                |
| Commercial Supplier                                              | n=6                                                                                                                                         | n=12                                                                                                               | n=11                                                                                                                                                             |
| Previous experience of other technologies                        | -                                                                                                                                           | -                                                                                                                  | n=5                                                                                                                                                              |
| Previous experience of same/similar technology                   | n=6                                                                                                                                         | -                                                                                                                  | n=6                                                                                                                                                              |
| Showcase Hospitals Programme                                     | n=7                                                                                                                                         | -                                                                                                                  | n=8                                                                                                                                                              |
| Rapid Review Panel (RRP1)                                        | n=7                                                                                                                                         | n=1                                                                                                                | -                                                                                                                                                                |
| Expert advice                                                    | n=7                                                                                                                                         | n=4                                                                                                                | -                                                                                                                                                                |
| Own research / evaluation trial                                  | -                                                                                                                                           | n=2                                                                                                                | n=3                                                                                                                                                              |
| DH dissemination – conferences, websites                         | n=5                                                                                                                                         | n=1                                                                                                                | -                                                                                                                                                                |
| Internet                                                         | n=1                                                                                                                                         | -                                                                                                                  | -                                                                                                                                                                |
| Guidelines                                                       | -                                                                                                                                           | n=3                                                                                                                | -                                                                                                                                                                |

*n = number of trusts (out of a total population of 12 trusts studied)*

### Critical timing of innovation knowledge use

We found that at the earlier stages of the process, *'principles'* knowledge was given more attention overlooking important aspects of *'how-to'* knowledge. When *'how-to'* knowledge was considered late, there were negative implications for the adoption and implementation of the technologies (Table 3). For example, *'how-to'* knowledge was not considered early on in Trust 4 for the ultra violet light air sterilisation units, and consequently the technology was discontinued after adoption. Hidden running costs, such as replacing costly bulbs and filters regularly, as well as the practicality of assembling units on site, were overlooked. Conversely, when *'how-to'* knowledge was considered earlier by decision makers, successful technology adoption and implementation was evident. The 14 technology cases for which *'how-to'* knowledge was first considered during the 'initiation/pre-adoption' stage were all adopted and implemented successfully. The ten technology cases for which *'how-to'* knowledge was first considered during the 'adoption decision' stage, mainly during pre-adoption evaluation trial, resulted in informed organisational decisions to either adopt or reject technologies; and for those technologies adopted led to subsequent successful implementation. For the ten technology cases where *'how-to'* knowledge was first considered during 'implementation', uptake was challenging leading to unsuccessful implementation following initial adoption.

**Table 3** The stage when *'how-to'* knowledge was first considered in the process & associated outcome

| Pre-adoption / Initiation                                                         | Adoption decision                                                                                                                       | Post-adoption / Implementation                                          |
|-----------------------------------------------------------------------------------|-----------------------------------------------------------------------------------------------------------------------------------------|-------------------------------------------------------------------------|
| Infection Manager Software (T6) → <b>Successful adoption &amp; implementation</b> | Smart flat infection control computer keyboard & mouse (T8) → <b>Technology modification &amp; subsequent successful implementation</b> | Hydrogen Peroxide Vapour System (T9) → <b>Incomplete implementation</b> |
| Urinary Catheter Care Bundle (T1)                                                 | Hydrogen Peroxide Vapour                                                                                                                | Ultrasonic cleaning tanks (T5) →                                        |

|                                                          |                                                                                                            |                                                                                                                                                                  |                                                                                                                                  |
|----------------------------------------------------------|------------------------------------------------------------------------------------------------------------|------------------------------------------------------------------------------------------------------------------------------------------------------------------|----------------------------------------------------------------------------------------------------------------------------------|
| 1<br>2<br>3<br>4<br>5<br>6                               | →Successful adoption & implementation                                                                      | System (T7)→Implementation trial informed disinvestment                                                                                                          | Discontinued adoption of the technology                                                                                          |
| 7<br>8<br>9<br>10<br>11<br>12                            | Endoscopy sinks (T2)→Successful adoption & implementation                                                  | Ozone Sanitizer Machines (T9) →Successful adoption & implementation in 1 of the 2 hospital sites / not implemented in 2 <sup>nd</sup> site                       | Adenosine triphosphate (ATP)Hygiene Monitoring System (T9)→ Discontinued adoption of the technology                              |
| 13<br>14<br>15<br>16<br>17<br>18<br>19<br>20<br>21<br>22 | Real-time Polymerase Chain Reaction (PCR) for Norovirus testing (T2) →Successful adoption & implementation | Antiseptic Body Cleaning Washcloths 2% Chlorhexidine Gluconate (T10, T11)) →Implementation trial informed disinvestment (T10) / 'controlled & focused' use (T11) | Ultra Violet (UV) light air sterilisation units (T4)→ Discontinued adoption of the technology                                    |
| 23<br>24<br>25<br>26<br>27<br>28<br>29                   | Hydrogen Peroxide Vapour System (T12) →Successful adoption & implementation                                | Infection control IT surveillance system (T3)→ Delayed adoption& very delayed/incomplete implementation                                                          | Faecal management system(T10) → Discontinued adoption of the technology                                                          |
| 30<br>31<br>32<br>33<br>34<br>35                         | Adenosine triphosphate (ATP) Hygiene Monitoring System (T11, T12)→Successful adoption & implementation     | Hydrogen Peroxide Vapour System (T6) →Successful adoption & implementation                                                                                       | Adenosine triphosphate (ATP) Hygiene Monitoring System (T4)→Incomplete implementation                                            |
| 36<br>37<br>38<br>39<br>40<br>41<br>42                   | Microbiology testing: mass spectrometry analysis machine (T5) →Successful adoption & implementation        | Adenosine triphosphate (ATP) Hygiene Monitoring System (T5,T10)→Evaluation trial informed procurement & successful trust-wide implementation                     | Non-chlorine disinfectant(T10)→ Discontinued adoption of the technology                                                          |
| 43<br>44<br>45<br>46<br>47<br>48                         | Digital Count up posters/boards (T8) →Successful adoption & implementation                                 | Hand signage (T2) →Successful adoption & implementation                                                                                                          | Polymerase Chain Reaction(PCR) for MRSA testing (T2) → Delayed implementation                                                    |
| 49<br>50<br>51<br>52<br>53<br>54                         | Portable PC Tablets (T6, T8) →Successful adoption & implementation                                         |                                                                                                                                                                  | Chlorhexidine Gluconate (CHG) dressing (disk) to prevent Catheter-Related Blood Stream Infections (T4)→Incomplete implementation |
| 55<br>56<br>57<br>58<br>59<br>60                         | Individual Patients MRSA Decolonisation Pack (T11)                                                         |                                                                                                                                                                  | Ultra Violet (UV) light inspection units (T11)→                                                                                  |



1  
2  
3  
4  
5  
6  
7  
8  
9  
10  
11  
12  
13  
14  
15  
16  
17  
18  
19  
20  
21  
22  
23  
24  
25  
26  
27  
28  
29  
30  
31  
32  
33  
34  
35  
36  
37  
38  
39  
40  
41  
42  
43  
44  
45  
46  
47  
48  
49  
50  
51  
52  
53  
54  
55  
56  
57  
58  
59  
60

**→Successful adoption & implementation**

Single use disposable Blood Pressure Cuffs & Pulse Oximeter Probes (T7) **→Successful adoption & implementation**

Ultra Violet (UV) light hand inspection kit (T12) **→Successful adoption & implementation**

**Discontinued adoption of the technology**

---

NB: Four technologies are excluded in the table as there were no clear outcomes within the timeframe of the study

Looking in more detail at an example where ‘how-to’ knowledge was inadequately considered in the early stages of the process is that of ultrasonic cleaning tanks in Trust 5:

*“[the technology] was very definitely sold as a replacement for manual cleaning...we embarked in the belief that using the tank would mean that when the equipment came out at the other end and was dried it would be safe to use on the next patient...we didn’t feel comfortable [after having tested the tanks for bacteria levels in water after cleaning] and we felt that to make these pieces of equipment safe we would then manually go over them with a disinfectant...and this means additional workload”* [Senior IPC Nurse]

Important aspects of structural incompatibility only came to light during implementation, affecting the practical application of the technology. The water in the tanks needed to be replaced after each cleaning session, a long process as the tanks needed to be emptied first, then refilled and water heated overnight. This added to the hospital staff workload. The tanks needed to be hardwired for electricity, which meant no manoeuvrability – the initial plan had been to move the tanks around the hospital rather than shift dirty and bulky items to the tanks. Other health and safety issues were identified during early implementation. The technology though purchased by the trust, resulted in becoming obsolete;

1  
2  
3 the tanks were housed by estates in a storage area on the top floor of the hospital and used in a very  
4  
5 different way from the original plan.  
6  
7  
8  
9

10 An example where detailed attention was given to 'how-to' knowledge during the 'adoption decision'  
11  
12 stage informed subsequent purchases of infection control computer keyboards and mice (fully enclosed  
13  
14 and flat design enabling quick and thorough cleaning) used with Picture Archiving and Communication  
15  
16 Systems (PACS) in clinical areas. In Trust 8 feedback from chest consultants (principal users of the  
17  
18 technology) resulted in appropriate procurement of computer devices which were consistent with  
19  
20 working practices as well as compliant with infection prevention guidelines:  
21  
22  
23  
24  
25

26 *"Had we not changed the [the newly introduced] flat computer mouse to replace it with one that has got*  
27  
28 *a push scrolling button, the targeted users would not have used it at all; it is highly likely that they would*  
29  
30 *have replaced them with normal computer mouse instead..."* [Trust 8]  
31  
32  
33  
34  
35

### 36 **The influence of professional background and leadership role**

37  
38 We found variation in the priority given to the type of innovation knowledge across professional groups.  
39  
40 Consistently across the trusts consultant microbiologists, clinical matrons, and infection control nurses  
41  
42 looked at the same technologies differently and came to divergent decisions regarding the value of  
43  
44 specific technologies, or gave higher value to different sources and types of evidence. For instance, in  
45  
46 T4, T6, T7, T10, T11 the clinical microbiologists valued highly and almost exclusively 'principles'  
47  
48 knowledge to judge the effectiveness and appropriateness of technologies for the trusts. All clinical  
49  
50 microbiologists across trusts, looked primarily at peer reviewed published articles for such information.  
51  
52 In contrast, clinical matrons preferred more applied information about technology effectiveness and  
53  
54 would discount very technical accounts, as the following quote illustrates:  
55  
56  
57  
58  
59  
60

1  
2  
3  
4  
5  
6 “You don’t want such jargonistic information. You need to make it very simple to say this is how it works.  
7  
8 These are the benefits, blah, blah, blah, rather than going to such, you know, higher level of  
9  
10 microbiology” [Clinical Matron].  
11

12  
13  
14  
15 An IPC nurse in the same trust highlighted the importance of combining ‘how-to’ and ‘principles’  
16  
17 knowledge to assess effectiveness and appropriateness of the technologies:  
18

19  
20  
21 “You need both evidence from [peer review] papers and the practicality of using the product [in the local  
22  
23 context]. It’s very important” [IPC Nurse].  
24  
25  
26  
27

28  
29 Further, our systematic mapping of cases accounting for the type of trust and the types of innovation  
30  
31 knowledge prioritised showed that trusts affiliated with universities, comprising research active  
32  
33 organisations (T3, T4, T5, T8, T10,T11 – also see Table 1), meticulously searched for and emphasised  
34  
35 ‘principles’ knowledge that derived from scientific research. This attitude was mirrored across  
36  
37 professional groups, though was more pronounced in accounts by respondents from the medical  
38  
39 profession. Among this group of trusts, when the key decision maker, namely the Director of Infection  
40  
41 Prevention and Control (DIPC), was a nurse by profession (T8 and T11) the careful focus on ‘principles’  
42  
43 knowledge’ was more balanced by giving adequate attention to ‘how-to’ knowledge. By contrast, in the  
44  
45 trusts in which the key decision maker (DIPC) was a medical doctor by profession (T3, T4, T5, T10) the  
46  
47 ‘how-to’ knowledge was given less attention with subsequent adverse impact on adoption and  
48  
49 implementation of many of the technologies selected, as illustrated in the case examples in Table 3.  
50  
51  
52  
53  
54  
55  
56  
57  
58  
59  
60

1  
2  
3 Linked to this was the leadership role taken by the DIPC which had a bearing in technology adoption  
4 decisions. The leadership style adopted by DIPCs varied from 'heads on', technical and highly  
5 prescriptive to more discrete, strategic, 'hands off', and facilitating. This was an important theme that  
6 mediated the differing use of types of innovation knowledge sought by trusts. For example, the DIPCs in  
7 two of the trusts adopted very different leadership roles in the decision making process, partly due to  
8 different functional roles within their respective organisations. One of the DIPC's was clear about  
9 differentiating his/her role as a manager from his/her professional training as a microbiologist. The DIPC,  
10 who was also a Medical Director in the hospital, took the role of a facilitator:  
11  
12  
13  
14  
15  
16  
17  
18  
19  
20  
21  
22  
23

24 *"I'm a microbiologist by background but in this project,...something that I learnt right at the beginning,*  
25 *when I took on this post, is when you actually become a clinical manager or a clinical leader you actually*  
26 *have to drop your knowledge of your own ...because you start interfering... I think that is quite important*  
27 *for clinicians who become either leaders or managers of any sort, that they really have to let the*  
28 *professionals guide and say, this is what we need to do, and the role of the manager or leader is just to*  
29 *facilitate"* [DIPC]  
30  
31  
32  
33  
34  
35  
36  
37  
38  
39

40 In contrast, the second DIPC, who was also a consultant microbiologist but not a Medical Director in the  
41 hospital, felt that this management role could be effectively fulfilled only by virtue of one's professional  
42 training and specialist knowledge.  
43  
44  
45  
46  
47  
48

49 The first trust had 100% success in technology adoption and implementation, whilst the second had  
50 implementation success rate of 25%. In the first trust, the involvement of a more diverse set of  
51 stakeholders/professions in the process provided opportunities to critique both 'principles' and 'how-to'  
52 knowledge rather than focusing exclusively on one.  
53  
54  
55  
56  
57  
58  
59  
60

## DISCUSSION

### Main findings

We found the technology adoption process to be highly dynamic and iterative, comprising a number of sub-stages. Adoption decisions entailed the acquisition and processing of new knowledge primarily by teams or groups who sought to reduce uncertainty about an innovation. Trying to find solutions to problems was the key motivator for sourcing evidence across the cases.

The scientific knowledge on which claims of innovations' effectiveness were based was of greater interest to decision makers in the healthcare organisations studied. Empirical and experiential types of knowing were also widely used to judge the *effectiveness* and *appropriateness* of the technologies in the local setting, but were often assessed later in the process. This late consideration of 'how-to' knowledge had implications for successful adoption and implementation. In the cases where 'how-to' knowledge was given least priority during the early stages of 'initiation' and 'adoption decision', issues which should have been picked up when adoption decisions were being made came up at implementation trial and even once trust-wide implementation had begun. This resulted in: (a) increased likelihood of technology rejection or protracted procurement decision at the 'adoption decision' stage, (b) delayed or incomplete implementation, or discontinuance (following initial adoption) during the stage of 'post-adoption / implementation'.

Commercial suppliers and peer review publications were used as often as each other for '*principles*' knowledge whilst noting potential supplier bias. Suppliers responded to preferences for theoretical knowledge of a highly professionalised user group. This is in contrast to individual consumers where marketing, as well as consumer interest is focused on '*awareness*' and '*how-to*' knowledge<sup>15</sup>. Centralised

1  
2  
3 (health system) structures were particularly under-used as sources for *'principles'* knowledge and were  
4  
5 reported as less accessible and less relevant to the local context. Professional networks were widely  
6  
7 used and comprised practice-based, peer-mediated information about the innovations, relevant to the  
8  
9 micro-conditions of local settings.  
10  
11

12  
13  
14 The priority given to the three types of innovation knowledge depended on: (a) type of trust - teaching  
15  
16 hospitals or research active organisations prioritised *'principles'* knowledge; (b) professional background  
17  
18 of decision makers - members of the medical profession tended to prioritise *'principles'* and often  
19  
20 ignored *'how-to'* knowledge, while members of the nursing profession tended to balance the use of  
21  
22 *'principles'* and *'how-to'* knowledge; (c) organisational role and leadership style of the key decision  
23  
24 maker – the DIPC's leadership approach conditioned the level of involvement of staff outside of the IPC  
25  
26 team; where the DIPC had strategic oversight as Medical Director or Director of Nursing, this led to  
27  
28 wider involvement.  
29  
30  
31  
32  
33  
34

### 35 **Strengths and weaknesses discussing important differences in results with other studies**

36  
37 The scale of the study and the real time nature of investigating 38 adoption and implementation  
39  
40 processes over a period of 18 months provided a rich dataset. Our study is theory driven and comprises  
41  
42 multi-site, comparative case studies which overall enhance the generalisability of findings beyond the  
43  
44 context of the specific sites studied<sup>27</sup>. We explicitly studied cases of non-adoption and discontinuation  
45  
46 after initial adoption, which are rarely included in innovation diffusion studies. We looked at centralised,  
47  
48 organisational, professional and local influences in the process.  
49  
50  
51

52  
53  
54 On limitations, the predefined sample in our study was not exhaustive by trust type, though sufficiently  
55  
56 diverse (Table 1). At the same time, a common barrier to adoption (availability of funding) was  
57  
58  
59  
60

1  
2  
3 'controlled for' in this sample, allowing other factors during adoption decision to be explored. We were  
4  
5 not able to follow implementation past the end of August 2010 and therefore do not have information  
6  
7 on routinised use of the implemented technologies.  
8  
9

10  
11  
12 Data from all our cases show that acceptance of the knowledge associated with innovative technologies  
13  
14 depended on the perceived credibility of the source. Current health policy practice, as outlined in the  
15  
16 introduction, is implicitly founded on the notion that health professionals do access primarily centralised  
17  
18 sources to acquire knowledge about innovative technologies. Our findings differ, emphasising a more  
19  
20 prominent role of local and peer-mediated sources, such as professional associations, local practice  
21  
22 trials, experiences of peers and local experts.  
23  
24  
25

26  
27  
28 Whilst innovation literature in commercial sectors considers the three types of innovation knowledge in  
29  
30 technology adoption by individuals<sup>15</sup>, the role of these types of knowledge in organisational decisions  
31  
32 within the highly professionalised context of a healthcare system is missing. In addition, our study shows  
33  
34 *how* the interplay between the types of innovation knowledge at different stages of the process  
35  
36 mediates the adoption or implementation outcome and the role of professionals in this interplay. This  
37  
38 builds on work by Ferlie and colleagues<sup>5</sup> who looked at the adoption of guidelines in four areas of clinical  
39  
40 care and found that there are cognitive, social and epistemic barriers to knowledge flow amongst health  
41  
42 professionals. In particular, our findings suggest a differential approach by diverse professional groups in  
43  
44 seeking and prioritising '*how-to*' knowledge.  
45  
46  
47  
48  
49

50  
51  
52 Data from all cases show that '*how-to*' knowledge was important in the innovation process, not only  
53  
54 operationally but also strategically, spanning issues of structural and cultural compatibility, and  
55  
56  
57  
58  
59  
60

1  
2  
3 sustainability. Our findings suggest a more prominent focus for 'how-to' knowledge in the future, by  
4  
5 both practitioners and researchers<sup>36,37</sup>.  
6  
7  
8  
9

### 10 **Meaning of the study: possible explanations and implications for clinicians and policymakers**

11  
12 Health systems remain to fully exploit patient benefit through sustainable use of evidence-based  
13  
14 technologies<sup>38,39</sup>. This study provides actionable insights to address the evidence-practice gap relevant  
15  
16 to a range of stakeholders, including operational and senior managers, frontline clinicians, policy  
17  
18 makers, academics and the industry. Balancing 'principles' and 'how-to' knowledge at the *early* stages of  
19  
20 the innovation process will provide decision makers with clinical and financial justification for  
21  
22 innovations, as well as practical implementation guidance. Identifying appropriate individuals or  
23  
24 developing organisational structures to facilitate this knowledge transfer is critical for informed  
25  
26 adoption decisions and successful implementation of innovations. Learning from discontinued adoption  
27  
28 or failed implementation of technologies is as important as success stories. Given the patterns of  
29  
30 knowledge exchange amongst our respondents, investing in horizontal knowledge exchange to  
31  
32 complement 'top down' knowledge transfer is indicated. Appraising the local environment for structural  
33  
34 and cultural compatibility of the technologies is essential along with evidence for efficacy and cost-  
35  
36 effectiveness, to avoid waste of valuable resources, and potential to cause inadvertent harm from  
37  
38 inappropriate implementation.  
39  
40  
41  
42  
43  
44  
45

46  
47 There are implications here of who is involved in the innovation adoption process and the role played by  
48  
49 key decision makers. Since healthcare services are increasingly configured as multi-professional team  
50  
51 activities<sup>40</sup> organisational innovation adoption decisions need also to account for local attitudes to  
52  
53 evidence of different professional groups. Policy makers need to reconcile the need for central guidance  
54  
55  
56  
57  
58  
59  
60



1  
2  
3 and quality standards with locally relevant practice-based evidence to contextualise the research in line  
4  
5 with practical needs.  
6  
7  
8  
9

### 10 **Future research and unanswered questions**

11  
12 To develop an innovation agenda where evidence influences technology adoption there needs to be  
13 some agreement as to what constitutes evidence, and how different forms of evidence might be  
14 relevant to diverse policy and practice questions. Our data illustrate that scientifically produced research  
15 findings were not the only influence on adopters' behaviour with respect to innovative technologies;  
16 empirical and experiential forms of knowledge were also widely used. More work is needed to  
17 understand how organisational priorities shape the perspective of organisational leaders and other key  
18 decision makers. A study in progress funded by NIHR/SDO considers such issues in depth<sup>41</sup>.  
19  
20  
21  
22  
23  
24  
25  
26  
27  
28  
29  
30

31 A number of other questions remain unanswered. Future studies need to account for individual and  
32 organisational motivation to source evidence. Also, given that different professionals view different  
33 sources and types of evidence differently, how can these differences be reconciled? And who can play  
34 the role of 'evidence broker'? The innovation literature describes the effective role of champions – we  
35 need to know if these champions are also effective knowledge brokers able to consider all three types of  
36 innovation knowledge. Perhaps champions are inherently biased towards their chosen technology,  
37 pointing to wider involvement of a multi-disciplinary team. Finally, we need to account for influences of  
38 different health system structures (centralised tax based versus disaggregated 'market' systems) and  
39 how these shape use of evidence and ultimately, innovation uptake.  
40  
41  
42  
43  
44  
45  
46  
47  
48  
49  
50  
51  
52  
53  
54  
55  
56  
57  
58  
59  
60

## References

1. Darzi A. High Quality Care for All Department of Health, 2008.
2. Blumenthal D. Stimulating the Adoption of Health Information Technology. *New England Journal of Medicine* 2009;360(15):1477-79.
3. Cutler DM. Where Are The Health Care Entrepreneurs? The Failure of Organizational Innovation in Health Care. *National Bureau of Economic Research Working Paper Series* 2010;No. 16030.
4. Berwick DM. Disseminating Innovations in Health Care. *JAMA: The Journal of the American Medical Association* 2003;289(15):1969-75.
5. Ferlie E, Fitzgerald L, Wood M, Hawkins C. The Nonspread of Innovations: The Mediating Role of Professionals. *Academy of Management Journal* 2005;48(1):117-34.
6. Greenhalgh T, Robert G, Macfarlane F, Bate P, Kyriakidou O. Diffusion of Innovations in Service Organizations: Systematic Review and Recommendations. *Milbank Quarterly* 2004;82(4):581-629.
7. Cooksey D. A Review of UK Health Research Funding. In: Treasury H, editor: HM Treasury, December 2006.
8. Department of Health. Report of the High Level Group on Clinical Effectiveness. London: Department of Health, 2007.
9. Clinical Effectiveness Research Agenda Group. An Implementation Research Agenda: A report prepared for the High Level Group on Clinical Effectiveness by the Clinical Effectiveness Research Agenda Group: Clinical Effectiveness Research Agenda Group, 2008.
10. Rye CB, Kimberly JR. The Adoption of Innovations by Provider Organizations in Health Care. *Medical Care Research and Review* 2007;64(3):235-78.
11. Nutley SM, Walter I, Davies HTO. *Using Evidence - how research can inform public services*. Bristol: The Policy Press, 2007.
12. Nutley SM, Walter I, Davies HTO. *Using Evidence: How research can inform public services*. Bristol: The Policy Press, 2007.
13. Robert G, Greenhalgh T, Macfarlane F, Peacock R. Organisational factors influencing technology adoption and assimilation in the NHS: a systematic literature review. *Report for the National Institute for Health Research Service Delivery and Organisation Programme: NIHR/SDO*, June 2009.
14. Damanpour F, Schneider M. Phases of the adoption of innovations in organisations: effects of environment, organisation and top managers. *British Journal of Management* 2006;17(3):21.
15. Rogers EM. *Diffusion of Innovations*. 5th ed. New York: Free Press, 2003.
16. Van de Ven AH, Polley DE, Garud Ra, Venkataraman S. *The Innovation Journey*. Oxford, New York: Oxford University Press Inc, 1999.
17. Department of Health. Clean Safe Care: reducing infections and saving lives: Department of Health, 2008:40.
18. Craig A. U. MMD, Doshi J.A., Agarwal R., Williams, K. and Brennan, P.J. Estimating the Proportion of Healthcare-Associated Infections That Are Reasonably Preventable and the Related Mortality and Costs. *Infection Control and Hospital Epidemiology* 2011;32(2):14.
19. World Health Organization. Prevention of hospital-acquired infections: A practical guide. In: Duce G, Fabry, J. and Nicolle, L., editor. 2nd ed: World Health Organization, 2002.
20. Scott RD. The Direct Medical Costs of Healthcare-Associated Infections in U.S. Hospitals and the Benefits of Prevention: Centers for Disease Control and Prevention, 2009.

- 1
- 2
- 3
- 4 21. Klevens RM, Edwards, J.R., Richards, C.L., Horan, T.C., Gaynes, R.P., Pollock, D.A. and Cardo, D.M.  
5 Estimating Health Care-Associated Infections and Deaths in U.S. Hospitals, 2002. *Public Health*  
6 *Reports* 2007;122(2):6.
- 7 22. Smyth ETM, McIlvenny G, Enstone JE, Emmerson AM, Humphreys H, Fitzpatrick F, et al. Four Country  
8 Healthcare Associated Infection Prevalence Survey 2006: overview of the results. *Journal of*  
9 *Hospital Infection* 2008;69(3):230-48.
- 10 23. Office for National Statistics. Health Statistics Quarterly 39. In: Statistics OfN, editor: Palgrave  
11 Macmillan, 2008.
- 12 24. Pratt RJ, Pellowe C, Loveday HP, Robinson N, Smith GW, Barrett S, et al. The epic Project: Developing  
13 National Evidence-based Guidelines for Preventing Healthcare associated Infections. *Journal of*  
14 *Hospital Infection* 2001;47(Supplement 1):S3-S4.
- 15 25. Kyratsis Y, Ahmad R, Holmes A. Understanding the Process of Innovation Adoption in 12 NHS trusts –  
16 technology selection, procurement and implementation to help reduce HCAs. London:  
17 Department of Health, 2010:331.
- 18 26. Eisenhardt KM. Building Theories from Case Study Research. *Academy of Management Review*  
19 1989;14(4):532-50.
- 20 27. Fitzgerald L, Dopson S. Comparative Case Study Designs: their utility and development in  
21 organizational research. In: Buchanan D, Bryman A, editors. *The SAGE Handbook of*  
22 *Organizational Research Methods*: SAGE Publications Ltd, 2009:465-83.
- 23 28. Lee T. *Using Qualitative Methods In Organizational Research*: SAGE Publications, Inc 1998.
- 24 29. Bradley EH, Curry LA, Devers KJ. Qualitative Data Analysis for Health Services Research: Developing  
25 Taxonomy, Themes, and Theory. *Health Services Research* 2007;42(4):1758-72.
- 26 30. Atun RA, Kyratsis I, Jelic G, Rados-Malicbegovic D, Gurol-Urganci I. Diffusion of complex health  
27 innovations—implementation of primary health care reforms in Bosnia and Herzegovina. *Health*  
28 *Policy and Planning* 2007;22(1):28-39.
- 29 31. Pope C, Ziebland S, Mays N. Analysing qualitative data. *BMJ* 2000;320(7227):114-16.
- 30 32. Sofaer S. Qualitative Methods: What Are They and Why Use Them? *Health Services Research*  
31 1999;34(5):17.
- 32 33. Barbour RS. Checklists for improving rigour in qualitative research: a case of the tail wagging the  
33 dog? *BMJ* 2001;322(7294):1115-17.
- 34 34. Mays N, Pope C. Assessing quality in qualitative research. *BMJ* 2000;320(7226):50-52.
- 35 35. Barry CA, Britten N, Barber N, Bradley C, Stevenson F. Using Reflexivity to Optimize Teamwork in  
36 Qualitative Research. *Qualitative Health Research* 1999;9(1):26-44.
- 37 36. Gladwin J, Dixon R, Wilson T. Rejection of an innovation: health information management training  
38 materials in east Africa. *Health Policy and Planning* 2002;17(4):354-61.
- 39 37. Fitzgerald L, Ferlie E, Wood M, Hawkins C. Interlocking Interactions, the Diffusion of Innovations in  
40 Health Care. *Human Relations* 2002;55(12):1429-49.
- 41 38. Halladay M, Bero L. Implementing Evidence-Based Practice in Health Care. *Public Money &*  
42 *Management* 2000;20:43-50.
- 43 39. Sheikh A, Cornford T, Barber N, Avery A, Takian A, Lichtner V, et al. Implementation and adoption of  
44 nationwide electronic health records in secondary care in England: final qualitative results from  
45 prospective national evaluation in “early adopter” hospitals. *BMJ* 2011;343.
- 46 40. Meads G, Ashcroft J, Barr H, Scott R, Wild A. *The case for interprofessional collaboration in health*  
47 *and social care*: Wiley-Blackwell, 2005.
- 48 41. Kyratsis Y, Ahmad R, Holmes A. Making sense of evidence in management decisions - the role of  
49 research-based knowledge on innovation adoption and implementation in healthcare: Study  
50 Protocol: National Institute for Health Research - Service Delivery and Organisation Programme,  
51 19 September 2011.
- 52
- 53
- 54
- 55
- 56
- 57
- 58
- 59
- 60

## Governance and ethics

Ethical approval was not required for the study under NHS research governance arrangements (letter dated 23 April 2009 by Hammersmith and Queen Charlotte's & Chelsea Research Ethics Committee). The research was classed as service evaluation by the chairman of the Committee. Access to the participating trusts was via DH in the first instance through an introductory letter. The trusts were then approached by a member of our research team. The project lead and IPC teams in each trust further facilitated access to those involved in the decision making, procurement and implementation of the selected technologies. Prior informed consent to join the study was obtained in writing by participating individuals. Author 1 and author 2 conducted the interviews, both experienced qualitative researchers with no prior relationship with the informants. Interviews were guided by a topic guide. All interviews, but one, were audio-recorded. Audio recorded interviews were transcribed verbatim by professional transcribers, and then checked by the researchers for accuracy. Primary data were anonymised and stored securely on password protected computers prior to processing.

## Acknowledgments

We would like to thank the participating hospitals for supporting this work and we thankfully acknowledge all respondents who participated in the study and kindly gave their time. We are also grateful to Sue Smalley from the Department of Health for project support and constructive feedback and Professor Charles Vincent from Imperial College Centre for Patient Safety and Service Quality for reviewing the draft manuscript. The authors acknowledge the UKCRC who fund the National Centre for Infection Prevention and Management and the National Institute for Health Research Biomedical Research Centre at Imperial College London.

1  
2  
3  
4  
5  
6  
7 **Funding:** This study is an independent study which was funded by the Department of Health  
8

9  
10 **Copyright for publication**

11  
12 The Corresponding Author has the right to grant on behalf of all authors and does grant on behalf of all  
13 authors, a worldwide licence to the Publishers and its licensees in perpetuity, in all forms, formats and  
14 media (whether known now or created in the future), to i) publish, reproduce, distribute, display and  
15 store the Contribution, ii) translate the Contribution into other languages, create adaptations, reprints,  
16 include within collections and create summaries, extracts and/or, abstracts of the Contribution, iii)  
17 create any other derivative work(s) based on the Contribution, iv) to exploit all subsidiary rights in the  
18 Contribution, v) the inclusion of electronic links from the Contribution to third party material where-  
19 ever it may be located; and, vi) licence any third party to do any or all of the above.  
20  
21  
22  
23  
24  
25  
26  
27  
28  
29  
30  
31

32 **No competing interests**

33  
34 All authors have completed the Unified Competing Interest form at [www.icmje.org/coi\\_disclosure.pdf](http://www.icmje.org/coi_disclosure.pdf)  
35 (available on request from the corresponding author) and declare: no support from any organisation for  
36 the submitted work; no financial relationships with any organisations that might have an interest in the  
37 submitted work in the previous 3 years; no other relationships or activities that could appear to have  
38 influenced the submitted work.  
39  
40  
41  
42  
43  
44  
45  
46

47 **Details of contributors**

48  
49 YK and RA conceived the idea for the paper, collected and systematically analysed all data. All three  
50 authors interpreted the data. YK designed the initial study and drafted the article, RA contributed to  
51 study design and all three authors revised it critically for important intellectual content. All three  
52 authors approve the content of the manuscript submitted.  
53  
54  
55  
56  
57  
58  
59  
60



**Technology adoption and implementation in organisations –  
comparative case studies of 12 English NHS Trusts**

|                                 |                                                                                                                                                                                                                                                                                                                                                                             |
|---------------------------------|-----------------------------------------------------------------------------------------------------------------------------------------------------------------------------------------------------------------------------------------------------------------------------------------------------------------------------------------------------------------------------|
| Journal:                        | <i>BMJ Open</i>                                                                                                                                                                                                                                                                                                                                                             |
| Manuscript ID:                  | bmjopen-2012-000872.R1                                                                                                                                                                                                                                                                                                                                                      |
| Article Type:                   | Research                                                                                                                                                                                                                                                                                                                                                                    |
| Date Submitted by the Author:   | 22-Feb-2012                                                                                                                                                                                                                                                                                                                                                                 |
| Complete List of Authors:       | Kyratsis, Yiannis; Imperial College London, National Centre for Infection Prevention and Management, Faculty of Medicine<br>Ahmad, Raheelah; Imperial College London, National Centre for Infection Prevention and Management, Faculty of Medicine<br>Holmes, Alison; Imperial College London, National Centre for Infection Prevention and Management, Faculty of Medicine |
| <b>Primary Subject Heading</b>: | Health services research                                                                                                                                                                                                                                                                                                                                                    |
| Secondary Subject Heading:      | Medical management, Qualitative research, Infectious diseases, Evidence based practice, Sociology                                                                                                                                                                                                                                                                           |
| Keywords:                       | HEALTH SERVICES ADMINISTRATION & MANAGEMENT, Change management < HEALTH SERVICES ADMINISTRATION & MANAGEMENT, Organisation of health services < HEALTH SERVICES ADMINISTRATION & MANAGEMENT, Organisational development < HEALTH SERVICES ADMINISTRATION & MANAGEMENT, Health policy < HEALTH SERVICES ADMINISTRATION & MANAGEMENT, Infection control < INFECTIOUS DISEASES |
|                                 |                                                                                                                                                                                                                                                                                                                                                                             |

SCHOLARONE™  
Manuscripts

1  
2  
3 **Technology adoption and implementation in organisations – comparative case studies of 12 English**

4  
5 **NHS Trusts**

6  
7  
8  
9 **Dr Yiannis Kyratsis** (corresponding author)

10  
11 Research Fellow, National Centre for Infection Prevention and Management

12  
13 Faculty of Medicine, Imperial College London

14  
15 Level 2 Infection Control, Hammersmith House, Hammersmith Hospital campus

16  
17 Du Cane Road, W12 0HS, London, United Kingdom

18  
19 Email: [y.kyratsis@imperial.ac.uk](mailto:y.kyratsis@imperial.ac.uk)

20  
21  
22  
23 Tel: 0044 20 8383 3277; Fax: 0044 20 8383 3235

24  
25  
26  
27 **Dr Raheelah Ahmad**

28  
29 Research Associate, National Centre for Infection Prevention and Management

30  
31 Faculty of Medicine, Imperial College London, United Kingdom

32  
33 Level 2 Infection Control, Hammersmith House, Hammersmith Hospital campus

34  
35 Du Cane Road, W12 0HS, London, United Kingdom

36  
37  
38  
39 **Professor Alison Holmes**

40  
41 Professor in Infectious Diseases & Director of Infection Prevention and Control

42  
43 National Centre for Infection Prevention and Management

44  
45 Faculty of Medicine, Imperial College London, United Kingdom

46  
47 Level 2 Infection Control, Hammersmith House, Hammersmith Hospital campus

48  
49 Du Cane Road, W12 0HS, London, United Kingdom

50  
51  
52  
53 **Keywords:** innovation adoption, technology, infection prevention, evidence **Word count: 3,960**

**ABSTRACT**

**Objectives:** To understand organisational technology adoption (initiation, adoption decision, implementation) by looking at the different types of innovation knowledge used during this process.

**Design:** Qualitative, multi-site, comparative case study design.

**Setting:** One primary care and 11 acute care organisations (trusts) across all health regions in England in the context of infection prevention and control.

**Participants and data analysis:** 121 semi-structured individual and group interviews with 109 informants, involving clinical and non-clinical staff from all organisational levels and various professional groups. Documentary evidence and field notes were also used. 38 technology adoption processes were analysed using an integrated approach combining inductive and deductive reasoning.

**Main findings:** Those involved in the process variably accessed three types of innovation knowledge: *'awareness'* (information that an innovation exists), *'principles'* (information about an innovation's functioning principles), and *'how-to'* (information required to use an innovation properly at individual and organisational levels). Centralised (national, government-led) and local sources were used to obtain this knowledge. Localised professional networks were preferred sources for all three types of knowledge. Professional backgrounds influenced an asymmetric attention to different types of innovation knowledge. When less attention was given to *'how-to'* compared to *'principles'* knowledge at the early stages of the process this contributed to 12 cases of incomplete implementation or discontinuance after initial adoption.

**Conclusions:** Potential adopters and change agents often overlooked or undervalued *'how-to'* knowledge. Balancing *'principles'* and *'how-to'* knowledge early in the innovation process enhanced successful technology adoption and implementation by considering efficacy as well as strategic,



1  
2  
3 structural and cultural fit with the organisation's context. This learning is critical given the policy  
4  
5 emphasis for health organisations to be innovation-ready.  
6  
7

8 **Word count: 268 (word limit 300 words)**  
9

10  
11  
12  
13  
14 **ARTICLE SUMMARY**  
15

16  
17  
18 **Article focus**  
19

- 20
- 21 • Despite policy support and the development of a dedicated evidence dissemination  
22 infrastructure in the NHS, why is technology adoption and implementation still a challenge?  
23
  - 24 • We need to understand better *how* the innovation process unfolds in organisations to build  
25 on what we know about individual behaviours. In particular, how the use of different types of  
26 knowledge about an innovation impacts its adoption and implementation.  
27  
28  
29  
30

31  
32 **Key messages**  
33

- 34
- 35 • In our study, centralised dissemination of evidence had minimal to moderate impact on  
36 organisational innovation adoption decisions. Practice-based, peer-mediated, and local  
37 dissemination systems were perceived more relevant.  
38
  - 39 • In contrast to technology adoption by individuals, organisational adoption required a wider,  
40 multi-faceted conceptualisation of '*how-to*' knowledge in line with the more complex  
41 dynamics in organisations. When '*how-to*' knowledge was undervalued and considered late,  
42 important strategic, structural, and cultural elements of the trust's context were overlooked.  
43 This had negative implications for technology adoption and implementation.  
44  
45  
46  
47  
48  
49
  - 50 • Professional backgrounds of those involved in the process influenced the types of innovation  
51 knowledge considered, which had implications for implementation. The involvement of  
52  
53  
54  
55  
56  
57  
58  
59  
60

1  
2  
3  
4  
5  
6  
7  
8  
9  
diverse professionals in decision making improves the chances of successful implementation through a balanced consideration of the strength of scientific evidence and practical application.

#### 10 11 **Strengths and limitations**

- 12  
13 • The scale of the study, its real time and longitudinal nature provide a rich dataset. Our study is theory driven and comprises multi-site, comparative case studies, which enhance the generalisability of findings beyond the context of the studied trusts.
- 14  
15  
16  
17  
18 • We explicitly studied cases of non-adoption and discontinuation after initial adoption, to provide important learning often missing from innovation diffusion research.
- 19  
20  
21  
22  
23  
24 • On limitations, we were not able to follow implementation past the end of August 2010 and therefore do not have information on routinised use of the implemented technologies.
- 25  
26  
27  
28

## 30 31 32 33 34 35 36 37 38 39 40 41 42 43 44 45 46 47 48 49 50 51 **INTRODUCTION**

52  
53  
54 The recent focus by policy makers on quality and efficiency in healthcare<sup>1</sup>, highlight the need to harness  
55  
56 new healthcare technologies and innovation to improve quality of patient care and health system  
57  
58  
59  
60

1  
2  
3 productivity<sup>2 3</sup>. The uptake and implementation of new technologies in healthcare has often proved  
4  
5 challenging and in some cases very slow<sup>4-6</sup>. In the UK the significant 'research to practice' knowledge gap  
6  
7 and the suboptimal implementation of new ideas and technologies into clinical practice have been  
8  
9 emphasised in several recent policy documents<sup>7-9</sup>. Policy and academic systematic reviews<sup>6 10</sup>  
10  
11 consistently show that there remains a poor understanding of the mechanisms and processes that  
12  
13 encourage the adoption of new interventions. Specifically, attention to the processes by which  
14  
15 organisational members access and use implementation and clinical evidence during decision making is  
16  
17 required<sup>9 11 12</sup>. As regards technology adoption in the National Health Service (NHS) a recent systematic  
18  
19 review<sup>13</sup> has found that there has been little research in this area.  
20  
21  
22  
23  
24  
25

26 In the last decade government funded agencies have been created to encourage innovation uptake and  
27  
28 promote the use of evidence-based innovations in the NHS<sup>14</sup>; such predominately centralised evidence  
29  
30 dissemination structures include the NHS Institute for Innovation and Improvement, the National  
31  
32 Institute for Health and Clinical Excellence (NICE) with the launch of the NHS Evidence online portal, and  
33  
34 the NHS Technology Adoption Centre, which works to speed-up the adoption of proven technologies by  
35  
36 NHS organisations. Despite these initiatives, the challenges of adopting novel technologies in the NHS  
37  
38 persist.  
39  
40  
41  
42  
43  
44

45 Our study addresses this research gap and is well grounded in innovation change and diffusion  
46  
47 theories<sup>15-17</sup>. Specifically, our study unpacks the innovation processes in organisations - in contrast to  
48  
49 individuals - by investigating in detail the interplay between the types and sources of innovation  
50  
51 knowledge used. We empirically focus our investigation on infection prevention & control (IPC) as it  
52  
53 represents a cross-cutting priority area in healthcare with application to primary and acute care, surgery  
54  
55 and medicine alike. While there has been increasing public and policy attention to address healthcare  
56  
57  
58  
59  
60

1  
2  
3 associated infections (Box 1) the uptake and implementation of new technologies in IPC varies and  
4  
5 remains slow<sup>18</sup>. This empirical setting, therefore, offers opportunities to generate transferrable lessons.  
6  
7  
8  
9

#### 10 **Box 1 Healthcare associated infections initiatives in the NHS**

12 Healthcare associated infections (HCAIs) are a worldwide problem causing high mortality and morbidity  
13  
14 with significant cost implications for health systems.<sup>19-24</sup> Both developing and more developed  
15  
16 countries face the challenge<sup>20</sup> and there is intense media and public attention on the issue. In the UK a  
17  
18 range of infection prevention and control policies have been introduced to help tackle the problem,  
19  
20 including legislation, performance targets, and clinical guidelines. In England the reporting of Meticillin-  
21  
22 resistant *Staphylococcus aureus* (MRSA) bloodstream infections and *Clostridium difficile* (*C.*  
23  
24 *difficile*) infections are mandatory and there are national and local targets for reduction as well as  
25  
26 national evidence-based guidelines.<sup>25</sup> The development of effective technology interventions to  
27  
28 complement good infection control practice is viewed as central to tackling HCAIs and a range of  
29  
30 evidence-based innovations have been developed. Government funded programmes, such as the  
31  
32 Department of Health 'HCAI Technology Innovation Programme'<sup>18</sup> have been created to fast track the  
33  
34 innovation process. Programme work-streams span development to procurement and implementation  
35  
36 processes and include: 'Smart Ideas', 'Design Bugs Out', 'Smart Solutions', 'Product Surgeries' and  
37  
38 'Showcase Hospitals', the latter focusing on the in-use value of HCAI technologies. In addition, the  
39  
40 Health Protection Agency (HPA) Rapid Review Panel (RRP) was set up in 2004 to review new HCAI-  
41  
42 related technologies providing a prompt assessment of new and novel equipment, materials, and other  
43  
44 products or protocols that may be of value to the NHS to help reduce HCAI rates; recommendation  
45  
46 statements about the novel products are given to suppliers and NHS bodies ('Recommendation 1'  
47  
48 being the highest, encouraging adoption by the NHS).  
49  
50  
51  
52  
53  
54  
55  
56  
57  
58  
59  
60

## METHODS

### Design and theoretical approach

This article reports on findings from a larger innovation adoption study in the area of HCAs commissioned by the Department of Health (DH)<sup>26</sup>. We employed a multiple case study research design to build theory inductively<sup>27</sup> covering the decision making, procurement, and implementation processes by NHS organisations when introducing innovative technologies. We undertook comparative case studies<sup>28</sup> across 12 NHS trusts in England with each trust and technology adoption decisions as units of analysis. Consistent with our research aims we employed interpretive methods of inquiry which allows description, interpretation, and explanation of a phenomenon rather than estimation of its prevalence<sup>29</sup>.

Damanpour and Schneider<sup>15</sup> suggest that the process of innovation adoption in organisations can be divided into three broad phases of 'pre-adoption', 'adoption decision' and 'post-adoption', also referred to in the literature as 'initiation', 'adoption (decision)', and 'implementation'<sup>16,14,27</sup>. In this article we use the latter terminology. Adoption is viewed as a process in which organisational members analyse the potential benefits and negative aspects of an innovation on the basis of gathered knowledge. During this process three types of innovation knowledge are important in moving potential adopters from 'ignorance' through awareness, attitude formation, evaluation and on to adoption – *"the decision to make full use of the innovation as the best course of action available"*<sup>16</sup>:

1. Awareness knowledge – the awareness that an innovation exists and knowledge of its key properties.
2. How-to knowledge – the information necessary to use an innovation properly.
3. Principles knowledge – information dealing with the functioning principles underlying how the innovation works.

The above definitions of innovation knowledge may be relatively simple and consistent when applied to technology adoption by individuals, while they become ambiguous when applied to the organisational setting in which the process is complex and contested<sup>13 30</sup>. Evidence is a form of knowledge and in this article comprises empirical, theoretical and experiential ways of knowing<sup>31</sup>.

### Sampling and settings

The study comprised one primary and 11 acute care organisations (NHS trusts), across all 10 Strategic Health Authorities (SHAs) in England. The trusts included in the study sample were diverse in geography, size and type (Table 1). The sample was predefined with one attribute in common as recipients of DH's 'HCAI Technology Innovation Award for outstanding contributions to fighting infections 2009'. The trusts were nominated by each SHA on the basis of having excelled in either turnaround or 'best in class' concerning infection prevention performance in the fiscal year 2008/9. The trusts were given free reign to use the sum to procure technologies that could help reduce HCAs (awarded in February 2009).

**Table 1 Case study sites characteristics**

| Trust | Trust type     | Number of beds | Population covered (m) | Financial turnover (m) | Number of sites | DIPC profession | Number of technologies adopted |
|-------|----------------|----------------|------------------------|------------------------|-----------------|-----------------|--------------------------------|
| T1    | S, PFI         | 1,269          | 0.75                   | £400                   | Multi-site      | Medical Doctor  | 1                              |
| T2    | S, F, PFI      | 754            | 0.34                   | £156                   | Multi-site      | Medical Doctor  | 6                              |
| T3    | T, U           | 1,902          | 1 (S)<br>3 (T)         | £652                   | Multi-site      | Medical Doctor  | 1                              |
| T4    | T, U, (PFI)    | 988            | 0.5 (S)<br>1.5 m (T)   | £420                   | Multi-site      | Medical Doctor  | 3                              |
| T5    | T, U, F, (PFI) | 2,068          | 0.5 (S)<br>1.7 (T)     | £648                   | Multi-site      | Medical Doctor  | 3                              |
| T6    | S, PFI         | 1,095          | 0.6                    | £430                   | Multi-site      | Medical Doctor  | 2                              |
| T7    | S, F, (PFI)    | 602            | 0.35                   | £200                   | One site        | Medical Doctor  | 4                              |

|      |                |        |                     |                      |            |                   |   |
|------|----------------|--------|---------------------|----------------------|------------|-------------------|---|
| T8*  | T, U, F        | 807    | 0.33 (S)<br>1.5 (T) | £250                 | One site   | Nurse             | 3 |
| T9   | T, F, (PFI), U | 1,150  | 0.12 (S)<br>1 m (T) | £440                 | Multi-site | Nurse             | 3 |
| T10  | S, (U)         | 974    | 0.6                 | £415                 | Multi-site | Medical<br>Doctor | 4 |
| T11* | T, U, F        | 802    | 0.3 (S)<br>1.5 (T)  | £400                 | Multi-site | Nurse             | 3 |
| T12* | P / I          | 76 (I) | 0.43                | £202 (P)<br>£744 (S) | Multi-site | Nurse             | 5 |

*P: primary, I: intermediate care, S: secondary, T: tertiary, U: university, F: foundation, PFI: private finance initiative, DIPC: Director of Infection Prevention & Control*

*\* Each of these trusts received £50K as the award was split across the health economy by the respective SHA whilst the remainder trusts each received £150K*

### Data collection and participants

We collected data from secondary sources to provide a historical dimension to better situate the studied decision making processes.

Data from primary sources comprised 121 semi-structured individual and group interviews carried out during the 18 months (July 2009 - August 2010). On average this equates to ten, hour-long interviews per trust. Twelve informants were interviewed more than once. Depending on the number and scope of technologies we conducted between two to five visits per trust. Within each of the trust sites we purposively sampled a diverse range of informants involved in the technology adoption or implementation, reflecting various perspectives, professional and organisational roles. Our participants included clinical and non-clinical managers, members of trusts' executive boards, health professionals, staff from estates and facilities and IPC teams comprising: DIPC, deputy DIPC, medical microbiologist, infection doctor, infection control nurses (the most populous group), surveillance staff, decontamination lead. Some IPC teams included a pharmacist or infection control matrons. .

1  
2  
3 Interviews explored individuals' perceptions, experiences, and views on the technology selection  
4 decisions, procurement and implementation processes. In the first visit the ongoing decision making  
5 process was captured and in follow up visits technology selection outcome and implementation  
6 experiences were explored. Field notes were taken during observation of technologies in-use and  
7 relevant meetings. Observation was used to familiarise with technologies and context, and triangulate  
8 interview data. For example in one trust a technology reported in interview accounts as 'fully  
9 implemented' was not verified as such during observation visits to implementation wards. A total of 20  
10 hours of observation were completed, on average 30 minutes per technology. Data collection at each  
11 site continued until all aspects of the decision process had been accounted for by a diverse sample of  
12 informants.  
13  
14  
15  
16  
17  
18  
19  
20  
21  
22  
23  
24  
25  
26  
27  
28

### 29 **Data analysis**

30  
31 We analysed data using an integrated approach<sup>32</sup>. Development of codes were initially derived from the  
32 primary data ('ground-up'), subsequently complemented with an organising conceptual framework for  
33 the adoption of complex health innovations<sup>32</sup>. This framework has been previously employed to  
34 understand multi-level innovation adoption<sup>33</sup>. Data analysis was conducted in parallel to ongoing data  
35 collection to feed emerging findings and 'test' these in subsequent interviews. The Qualitative Data  
36 Analysis computer software package N-Vivo 8 (QSR International) was used to systematically code the  
37 data and assist analysis, especially in cataloguing and linking concepts and codes. In line with  
38 recommendations by qualitative methodologists<sup>34-36</sup> authors 1 and 2 independently coded all data. The  
39 three authors met to review discrepancies<sup>32</sup>, enhancing internal validity<sup>36-38</sup>. Comparative cases were  
40 analysed in two stages: first each of the technologies within each trust, producing individual trust case  
41 studies; second a comparative analysis across the trusts. Summary tables were used to reduce the  
42 volume of primary data and to make analytical inferences by comparing and contrasting pairs and  
43  
44  
45  
46  
47  
48  
49  
50  
51  
52  
53  
54  
55  
56  
57  
58  
59  
60



1  
2  
3 groups of cases<sup>27</sup>. We defined the outcomes of the technology adoption process as follows: ‘successful  
4  
5 adoption’ - the organisational executive decision to make full use of a technology, which results in  
6  
7 procurement; ‘successful implementation’ – the technology is put into use and operationalised.  
8  
9

## 10 11 12 **MAIN FINDINGS**

### 13 14 **The organisational innovation process and outcomes**

15  
16  
17 Of the 38 organisational technology adoption decisions made during the period of the study, 22  
18  
19 technologies were successfully adopted and implemented, whilst 12 were discontinued after initial  
20  
21 adoption or only partially implemented (Table 3). There was no clear outcome within the timeframe of  
22  
23 the study for four technologies. The nature of technologies is described in detail elsewhere<sup>26</sup>. A general  
24  
25 typology of technologies isolated from context did not provide insights to likelihood of adoption. As  
26  
27 illustrated in Table 3 the same technologies (i.e. the Hydrogen Peroxide Vapour System, or the ATP  
28  
29 Hygiene Monitoring System) in diverse trusts and at different stages of the innovation process resulted  
30  
31 in differential outcomes. Most informants reported that they went through a series of evaluations,  
32  
33 choices and actions over time as the adopting trusts principally engaged in a problem solving exercise.  
34  
35 The process was dynamic, iterative and not always linear. The IPC team and some wider staff were  
36  
37 involved in adoption decisions. Whilst the formal executive decision lay with the DIPCs, they were not  
38  
39 always the key decision makers across the cases. The size and professional composition of the IPC  
40  
41 teams, and the professional background of the DIPC (Table 1), varied. We found that the majority of  
42  
43 technology decisions were led by a perceived need - an area of priority in IPC had been identified by  
44  
45 trusts first, and then relevant technologies were sought (‘need pull’). A minority of technology adoption  
46  
47 decisions were characterised by selecting a technology in the first instance and exploring how this might  
48  
49 fit with strategic plans and service needs (‘technology push’).  
50  
51  
52  
53  
54  
55  
56  
57  
58  
59  
60

### Use of innovation knowledge in the organisational setting

Trusts variably accessed and prioritised the three types of innovation knowledge in the organisational setting, and these comprised a much broader, multi-dimensional definition compared to a simpler definition when the potential user is an individual<sup>16</sup>. Under *'awareness'* knowledge the trusts considered the range of technologies available to address a particular problem, as well as key features and potential cost implications of such technologies. In seeking *'principles'* knowledge the trusts sought primarily evidence of the technologies' technical efficacy based on the scientific principles behind the technology. They assessed the validity of claims made by commercial suppliers. In the *'how-to'* knowledge the trusts sought knowledge about the practical application of the technologies in local healthcare settings with nine trusts trialling the technologies. This included users' experience with the technologies, aesthetics, functionality, as well as compatibility with strategic, structural and cultural elements of the trust's context. A more detailed estimation of the short-term and long-term associated costs also constituted *'how-to'* knowledge. Cost and effectiveness issues permeated the three types of innovation knowledge. The definition of *effectiveness* was broader when both *'principles'* and *'how-to'* knowledge were given sufficient attention and this ranged from local opinion including patient perceptions, ease of use by staff, to experimental controlled trials data. The majority of informants from all trusts noted that no particular technology could be solely or directly attributable to reducing HCAs and impact was attributable to ongoing multifaceted approaches.

### Centralised and local dissemination of innovation knowledge

Those involved in decisions used a wide range of *sources* to get information on the three types of innovation knowledge (Table 2). Peer review journals and commercial suppliers were used in all trusts to source *'principles'* knowledge. Supplier information was reported as compact and easy to access for practitioners, however this source was viewed as less credible. Of the government-funded centralised

evidence dissemination structures, DH Showcase Hospitals Programme was widely used by trusts for obtaining 'awareness' and 'how-to' knowledge but none of the trusts used it for 'principles' knowledge. Local expert advice was preferred to the dedicated central expert panel (RRP) for obtaining 'principles' knowledge, while guidelines were used by only three trusts. Professional networks consistently featured amongst the top sources for all three types of innovation knowledge. The latter were used to exchange experiences on the use of the same or similar technologies, spreading information horizontally via networks of peers and local experts.

**Table 2 Type and sources of innovation knowledge used in the technology adoption process per trust**

| <b>Types of Innovation Knowledge</b>           | <b>Awareness Knowledge:</b>                                                                                         | <b>Principles Knowledge:</b>                                                              | <b>'How to' Knowledge:</b>                                                                                                                |
|------------------------------------------------|---------------------------------------------------------------------------------------------------------------------|-------------------------------------------------------------------------------------------|-------------------------------------------------------------------------------------------------------------------------------------------|
| <b>Sources of Innovation Knowledge</b>         | Identify technologies available to specific IPC priority areas & information about the nature of these technologies | why and how a technology works in terms of the underlying scientific principles or theory | how to put the technology in use, including issues of compatibility with trust structures / strategy / culture & issues of sustainability |
| Professional networks / other NHS trusts       | n=11                                                                                                                | n=7                                                                                       | n=10                                                                                                                                      |
| Peer review journals                           | n=2                                                                                                                 | n=12                                                                                      | -                                                                                                                                         |
| Hospitals outside UK                           | n=1                                                                                                                 | -                                                                                         | -                                                                                                                                         |
| Commercial Supplier                            | n=6                                                                                                                 | n=12                                                                                      | n=11                                                                                                                                      |
| Previous experience of other technologies      | -                                                                                                                   | -                                                                                         | n=5                                                                                                                                       |
| Previous experience of same/similar technology | n=6                                                                                                                 | -                                                                                         | n=6                                                                                                                                       |
| Showcase Hospitals Programme                   | n=7                                                                                                                 | -                                                                                         | n=8                                                                                                                                       |
| Rapid Review Panel (RRP1)                      | n=7                                                                                                                 | n=1                                                                                       | -                                                                                                                                         |
| Expert advice                                  | n=7                                                                                                                 | n=4                                                                                       | -                                                                                                                                         |
| Own research / evaluation trial                | -                                                                                                                   | n=2                                                                                       | n=3                                                                                                                                       |
| DH dissemination – conferences, websites       | n=5                                                                                                                 | n=1                                                                                       | -                                                                                                                                         |
| Internet                                       | n=1                                                                                                                 | -                                                                                         | -                                                                                                                                         |

|            |   |     |   |
|------------|---|-----|---|
| Guidelines | - | n=3 | - |
|------------|---|-----|---|

*n= number of trusts (out of a total population of 12 trusts studied)*

### Critical timing of innovation knowledge use

We found that at the earlier stages of the process, *'principles'* knowledge was given more attention overlooking important aspects of *'how-to'* knowledge. When *'how-to'* knowledge was considered late, there were negative implications for the adoption and implementation of the technologies (Table 3). For example, *'how-to'* knowledge was not considered early on in Trust 4 for the ultra violet light air sterilisation units, and consequently the technology was discontinued after initial adoption. Hidden running costs, such as replacing costly bulbs and filters regularly, as well as the practicality of assembling units on site, were overlooked. Conversely, when *'how-to'* knowledge was considered earlier by decision makers, successful technology adoption and implementation was evident. The 14 technology cases for which *'how-to'* knowledge was first considered during the 'initiation' stage were all adopted and implemented successfully. The ten technology cases for which *'how-to'* knowledge was first considered during the 'adoption decision' stage, mainly during pre-adoption evaluation trial, resulted in informed organisational decisions to either adopt or reject technologies; and for those technologies adopted led to subsequent successful implementation. For the ten technology cases where *'how-to'* knowledge was first considered during 'implementation', uptake was challenging leading to unsuccessful implementation following initial adoption.

**Table 3 The stage when *'how-to'* knowledge was first considered in the process & associated outcome**

| Initiation                                                                        | Adoption decision                                                                                                                       | Implementation                                                          |
|-----------------------------------------------------------------------------------|-----------------------------------------------------------------------------------------------------------------------------------------|-------------------------------------------------------------------------|
| Infection Manager Software (T6) → <b>Successful adoption &amp; implementation</b> | Smart flat infection control computer keyboard & mouse (T8) → <b>Technology modification &amp; subsequent successful implementation</b> | Hydrogen Peroxide Vapour System (T9) → <b>Incomplete implementation</b> |

|                                                                                                                        |                                                                                                                                                                             |                                                                                                                                           |
|------------------------------------------------------------------------------------------------------------------------|-----------------------------------------------------------------------------------------------------------------------------------------------------------------------------|-------------------------------------------------------------------------------------------------------------------------------------------|
| Urinary Catheter Care Bundle (T1)<br>→ <b>Successful adoption &amp; implementation</b>                                 | Hydrogen Peroxide Vapour System (T7) → <b>Implementation trial informed disinvestment</b>                                                                                   | Ultrasonic cleaning tanks (T5) → <b>Discontinued adoption of the technology</b>                                                           |
| Endoscopy sinks (T2) → <b>Successful adoption &amp; implementation</b>                                                 | Ozone Sanitizer Machines (T9) → <b>Successful adoption &amp; implementation in 1 of the 2 hospital sites / not implemented in 2<sup>nd</sup> site</b>                       | Adenosine triphosphate (ATP) Hygiene Monitoring System (T9) → <b>Discontinued adoption of the technology</b>                              |
| Real-time Polymerase Chain Reaction (PCR) for Norovirus testing (T2) → <b>Successful adoption &amp; implementation</b> | Antiseptic Body Cleaning Washcloths 2% Chlorhexidine Gluconate (T10, T11) → <b>Implementation trial informed disinvestment (T10) / 'controlled &amp; focused' use (T11)</b> | Ultra Violet (UV) light air sterilisation units (T4) → <b>Discontinued adoption of the technology</b>                                     |
| Hydrogen Peroxide Vapour System (T12) → <b>Successful adoption &amp; implementation</b>                                | Infection control IT surveillance system (T3) → <b>Delayed adoption &amp; very delayed/incomplete implementation</b>                                                        | Faecal management system (T10) → <b>Discontinued adoption of the technology</b>                                                           |
| Adenosine triphosphate (ATP) Hygiene Monitoring System (T11, T12) → <b>Successful adoption &amp; implementation</b>    | Hydrogen Peroxide Vapour System (T6) → <b>Successful adoption &amp; implementation</b>                                                                                      | Adenosine triphosphate (ATP) Hygiene Monitoring System (T4) → <b>Incomplete implementation</b>                                            |
| Microbiology testing: mass spectrometry analysis machine (T5) → <b>Successful adoption &amp; implementation</b>        | Adenosine triphosphate (ATP) Hygiene Monitoring System (T5, T10) → <b>Evaluation trial informed procurement &amp; successful trust-wide implementation</b>                  | Non-chlorine disinfectant (T10) → <b>Discontinued adoption of the technology</b>                                                          |
| Digital Count up posters/boards (T8) → <b>Successful adoption &amp; implementation</b>                                 | Hand signage (T2) → <b>Successful adoption &amp; implementation</b>                                                                                                         | Polymerase Chain Reaction (PCR) for MRSA testing (T2) → <b>Delayed implementation</b>                                                     |
| Portable PC Tablets (T6, T8) → <b>Successful adoption &amp; implementation</b>                                         |                                                                                                                                                                             | Chlorhexidine Gluconate (CHG) dressing (disk) to prevent Catheter-Related Blood Stream Infections (T4) → <b>Incomplete implementation</b> |

Individual Patients MRSA  
Decolonisation Pack (T11)  
→ **Successful adoption &  
implementation**

Ultra Violet (UV) light  
inspection units (T11) →  
**Discontinued adoption of the  
technology**

Single use disposable Blood  
Pressure Cuffs & Pulse Oximeter  
Probes (T7) → **Successful  
adoption & implementation**

Ultra Violet (UV) light hand  
inspection kit (T12) → **Successful  
adoption & implementation**

---

NB: Four technologies are excluded in the table as there were no clear outcomes within the timeframe of the study

Looking in more detail at an example where ‘how-to’ knowledge was inadequately considered in the early stages of the process is that of ultrasonic cleaning tanks in Trust 5:

*“[the technology] was very definitely sold as a replacement for manual cleaning...we embarked in the belief that using the tank would mean that when the equipment came out at the other end and was dried it would be safe to use on the next patient...we didn’t feel comfortable [after having tested the tanks for bacteria levels in water after cleaning] and we felt that to make these pieces of equipment safe we would then manually go over them with a disinfectant...and this means additional workload” [Senior IPC Nurse]*

Important aspects of structural incompatibility only came to light during implementation. The water in the tanks needed to be replaced after each cleaning session, refilled and water heated overnight. This added to the hospital staff workload. The tanks needed to be hardwired for electricity, which meant no manoeuvrability – the initial plan had been to move the tanks around the hospital rather than shift dirty and bulky items to the tanks. The technology though purchased by the trust, resulted in becoming

1  
2  
3 obsolete; the tanks were housed by estates in a storage area on the top floor of the hospital and used in  
4  
5 a very different way from the original plan.  
6  
7

8  
9  
10 An example where detailed attention was given to 'how-to' knowledge during the 'adoption decision'  
11  
12 stage informed subsequent purchases of infection control computer keyboards and mice (fully enclosed  
13  
14 and flat design enabling quick and thorough cleaning) used with Picture Archiving and Communication  
15  
16 Systems (PACS) in clinical areas. In Trust 8 feedback from chest consultants (principal users of the  
17  
18 technology) resulted in appropriate procurement of computer devices which were consistent with  
19  
20 working practices as well as compliant with infection prevention guidelines:  
21  
22

23  
24  
25  
26 *"Had we not changed [the newly introduced] flat computer mouse to replace it with one that has got a*  
27  
28 *push scrolling button, the targeted users would not have used it at all; it is highly likely that they would*  
29  
30 *have replaced them with normal computer mouse instead..."* [Trust 8]  
31  
32

### 33 34 35 **The influence of professional background and organisational type**

36  
37 We found variation in the priority given to the type of innovation knowledge across professional groups.  
38  
39 Nurse professionals involved in adoption decisions reported taking an approach where careful focus on  
40  
41 'principles' knowledge' was balanced with adequate attention to 'how-to' knowledge. Conversely,  
42  
43 medical professionals always prioritised 'principles' knowledge. Consistently across the trusts consultant  
44  
45 microbiologists, clinical matrons, and infection control nurses looked at the same technologies  
46  
47 differently and came to divergent decisions regarding the value of specific technologies. Specifically in  
48  
49 T4, T6, T7, T10, T11 the clinical microbiologists valued almost exclusively 'principles' knowledge to judge  
50  
51 the effectiveness and appropriateness of technologies for the trusts. Clinical microbiologists across  
52  
53 trusts, looked primarily at peer reviewed published articles for such information. In contrast, clinical  
54  
55  
56  
57  
58  
59  
60

1  
2  
3 matrons preferred more applied information about technology effectiveness and would discount solely  
4  
5 technical accounts, as the following quote illustrates:  
6  
7

8  
9  
10 *“You don’t want such jargonistic information. You need to make it very simple to say this is how it works.*  
11  
12 *These are the benefits, blah, blah, blah, rather than going to such, you know, higher level of*  
13  
14 *microbiology”* [Clinical Matron].  
15  
16

17  
18  
19 An IPC nurse in the same trust highlighted the importance of combining ‘how-to’ and ‘principles’  
20  
21 knowledge to assess effectiveness and appropriateness of the technologies:  
22  
23

24  
25  
26 *“You need both evidence from [peer review] papers and the practicality of using the product [in the local*  
27  
28 *context]. It’s very important”* [IPC Nurse].  
29  
30

31  
32  
33 Trusts affiliated with universities, comprising research active organisations (T3, T4, T5, T8, T10, T11 –  
34  
35 also see Table 1), prioritised and systematically searched for scientifically produced ‘principles’  
36  
37 knowledge. This attitude was mirrored across professional groups, though was more pronounced in  
38  
39 accounts by respondents from the medical profession.  
40  
41  
42

## 43 44 45 **DISCUSSION**

### 46 47 **Main findings**

48  
49 We found the technology adoption process to be highly dynamic and iterative. Adoption decisions  
50  
51 entailed the acquisition and processing of new knowledge by organisational members who sought to  
52  
53 reduce uncertainty about an innovation. Trying to find solutions to problems was the key motivator for  
54  
55 sourcing evidence across the cases.  
56  
57  
58  
59  
60



1  
2  
3  
4  
5 Scientifically produced '*principles*' knowledge was prioritised by those involved in decisions to judge  
6  
7  
8 *effectiveness* of technologies. Empirical and experiential types of knowing were also widely used to  
9  
10 judge the *effectiveness* and *appropriateness* of the technologies in the local setting, but were often  
11  
12 assessed later in the process. This late consideration of '*how-to*' knowledge had implications for  
13  
14 successful adoption and implementation. In the cases where '*how-to*' knowledge was given least priority  
15  
16 during the early stages of 'initiation' and 'adoption decision', issues which should have been picked up  
17  
18 when adoption decisions were being made came up at implementation trial and even once trust-wide  
19  
20 implementation had begun. This resulted in: (a) increased likelihood of technology rejection or  
21  
22 protracted procurement decision at the 'adoption decision' stage, (b) delayed or incomplete  
23  
24 implementation, or discontinuance (following initial adoption) during the stage of 'implementation'.  
25  
26  
27  
28  
29

30  
31 Commercial suppliers and peer review publications were used as often as each other for '*principles*'  
32  
33 knowledge whilst noting potential supplier bias. Suppliers responded to preferences for theoretical  
34  
35 knowledge by a highly professionalised user group. This is in contrast to individual consumers where  
36  
37 marketing, as well as consumer interest is focused on '*awareness*' and '*how-to*' knowledge<sup>16</sup>. Centralised  
38  
39 (health system) structures were particularly under-used as sources for '*principles*' knowledge and were  
40  
41 reported as less accessible and less relevant to the local context. Professional networks were widely  
42  
43 used and comprised practice-based, peer-mediated information about the innovations' relevance to the  
44  
45 local setting.  
46  
47  
48  
49  
50

51  
52 The priority given to the three types of innovation knowledge depended on: (a) type of trust - teaching  
53  
54 hospitals or research active organisations prioritised '*principles*' knowledge; (b) professional background  
55  
56 of those involved in adoption decisions - members of the medical profession tended to prioritise  
57  
58  
59  
60

1  
2  
3  
4  
5  
6  
7  
8  
9  
10  
11  
12  
13  
14  
15  
16  
17  
18  
19  
20  
21  
22  
23  
24  
25  
26  
27  
28  
29  
30  
31  
32  
33  
34  
35  
36  
37  
38  
39  
40  
41  
42  
43  
44  
45  
46  
47  
48  
49  
50  
51  
52  
53  
54  
55  
56  
57  
58  
59  
60

*'principles'* and often ignored *'how-to'* knowledge, while members of the nursing profession tended to balance the use of *'principles'* and *'how-to'* knowledge.

### **Strengths and weaknesses**

The scale of the study and the real time nature of investigating 38 adoption and implementation processes over a period of 18 months provided a rich dataset. Our study is theory driven and comprises multi-site, comparative case studies which overall enhance the generalisability of findings beyond the context of the specific sites studied<sup>28</sup>. We explicitly studied cases of non-adoption and discontinuation after initial adoption, which are rarely included in innovation diffusion studies. We looked at centralised, organisational, professional and local influences in the process.

On limitations, the predefined sample in our study was not exhaustive by trust type, though sufficiently diverse (Table 1). At the same time, a common barrier to adoption (availability of funding) was 'controlled for' in this sample, allowing other factors during adoption decision to be explored. We were not able to follow implementation past the end of August 2010 and therefore do not have information on routinised use of the implemented technologies.

### **Important differences in results with other studies**

Whilst innovation literature in commercial sectors considers the types of innovation knowledge in technology adoption by individuals<sup>16</sup>, the role of these types of knowledge in organisational decisions within the highly professionalised context of a healthcare system is missing. The types of trusts, and the professional background of those involved in technology adoption decisions influenced how technologies were adopted and implemented in our study. These factors had bearing on the type of

1  
2  
3 innovation knowledge utilised and timing of this knowledge utilisation. These findings build on literature  
4  
5 which identifies interactions between the innovation, local actors, leadership, and multi-level contextual  
6  
7 factors<sup>13 39 10 40 41</sup> shaping the technology adoption process. Furthermore, our study demonstrates an  
8  
9 impact of variable use of knowledge on 'successful' adoption decisions. The role of professional  
10  
11 backgrounds in this process builds on work by Ferlie and colleagues<sup>5</sup> who looked at the adoption of  
12  
13 guidelines in four areas of clinical care and found that there are cognitive, social and epistemic barriers  
14  
15 to knowledge flow amongst health professionals.  
16  
17  
18  
19

20  
21 Data from all cases show that 'how-to' knowledge was important in the innovation process, not only  
22  
23 operationally but also strategically, spanning issues of structural and cultural compatibility, and  
24  
25 sustainability. This broader conceptualisation better aligns the construct with the complex adjustments  
26  
27 that are often needed in organisational settings<sup>6 30</sup>. Our findings suggest a more prominent focus for  
28  
29 'how-to' knowledge in the future, by both practitioners and researchers<sup>42 43</sup>.  
30  
31  
32  
33  
34  
35

### 36 **Implications for clinicians and policymakers**

37  
38 Health systems remain to fully exploit patient benefit through sustainable use of evidence-based  
39  
40 technologies<sup>44 45</sup>. Balancing 'principles' and 'how-to' knowledge at the *early* stages of the innovation  
41  
42 process will provide decision makers with clinical and financial justification for innovations, as well as  
43  
44 practical implementation guidance. Learning from discontinued adoption or failed implementation of  
45  
46 technologies is as important as success stories.  
47  
48  
49

50  
51 Data from all our cases show that acceptance of innovation knowledge depended on the perceived  
52  
53 credibility of the source. Current health policy practice, as outlined in the introduction, is implicitly  
54  
55 founded on the notion that health professionals do access primarily centralised sources to acquire  
56  
57  
58  
59  
60

1  
2  
3 knowledge about innovative technologies. Our findings differ, emphasising a more prominent role of  
4 local and peer-mediated sources, such as professional associations, local practice trials, experiences of  
5 peers and local experts. Given the patterns of knowledge exchange amongst our respondents, investing  
6 in horizontal knowledge exchange to complement 'top down' knowledge transfer is indicated.  
7  
8 Appraising the local environment for structural and cultural compatibility of the technologies is essential  
9 along with evidence for efficacy and cost-effectiveness, to avoid waste of valuable resources, and  
10 potential to cause inadvertent harm from inappropriate implementation.  
11  
12  
13  
14  
15  
16  
17  
18  
19

20  
21 There are implications here of who is involved in the innovation adoption process and the role played by  
22 key decision makers. Since healthcare services are increasingly configured as multi-professional team  
23 activities<sup>46</sup> organisational innovation adoption decisions need also to account for local attitudes to  
24 evidence of different professional groups. Policy makers need to reconcile the need for central guidance  
25 and quality standards with locally relevant practice-based evidence to contextualise the research in line  
26 with practical needs.  
27  
28  
29  
30  
31  
32  
33  
34  
35  
36  
37

### 38 **Future research and unanswered questions**

39  
40 More work is needed to understand how organisational priorities shape the perspective of  
41 organisational leaders and other key decision makers regards innovation knowledge. In particular, a  
42 better understanding of the dynamics in the late stages of the innovation process in organisations  
43 (implementation and routinisation) is needed. A study in progress funded by NIHR/SDO considers such  
44 issues in depth<sup>47</sup>.  
45  
46  
47  
48  
49  
50  
51

52  
53 A number of other questions remain unanswered. Future studies need to account for individual and  
54 organisational motivation to source evidence. Also, given that different professionals view different  
55  
56  
57  
58  
59  
60

1  
2  
3 sources and types of evidence differently, how can these differences be reconciled? And who can play  
4  
5 the role of 'evidence broker'? Finally, we need to account for wider influences of different health system  
6  
7 structures (centralised tax based versus disaggregated 'market' systems) and how these shape use of  
8  
9 evidence and ultimately, innovation uptake.  
10  
11  
12  
13

## 14 15 16 17 18 19 20 21 22 23 24 25 26 27 28 29 30 31 32 33 34 35 36 37 38 39 40 41 42 43 44 45 46 47 48 49 50 51 52 53 54 55 56 57 58 59 60

### References

1. Darzi A. High Quality Care for All Department of Health, 2008.
2. Blumenthal D. Stimulating the Adoption of Health Information Technology. *New England Journal of Medicine* 2009;360(15):1477-79.
3. Cutler DM. Where Are The Health Care Entrepreneurs? The Failure of Organizational Innovation in Health Care. *National Bureau of Economic Research Working Paper Series* 2010;No. 16030.
4. Berwick DM. Disseminating Innovations in Health Care. *JAMA: The Journal of the American Medical Association* 2003;289(15):1969-75.
5. Ferlie E, Fitzgerald L, Wood M, et al. The Nonspread of Innovations: The Mediating Role of Professionals. *Academy of Management Journal* 2005;48(1):117-34.
6. Greenhalgh T, Robert G, Macfarlane F, et al. Diffusion of Innovations in Service Organizations: Systematic Review and Recommendations. *Milbank Quarterly* 2004;82(4):581-629.
7. Cooksey D. A Review of UK Health Research Funding. In: Treasury H, editor: HM Treasury, December 2006.
8. Department of Health. Report of the High Level Group on Clinical Effectiveness. London: Department of Health, 2007.
9. Clinical Effectiveness Research Agenda Group. An Implementation Research Agenda: A report prepared for the High Level Group on Clinical Effectiveness by the Clinical Effectiveness Research Agenda Group: Clinical Effectiveness Research Agenda Group, 2008.
10. Rye CB, Kimberly JR. The Adoption of Innovations by Provider Organizations in Health Care. *Medical Care Research and Review* 2007;64(3):235-78.
11. Nutley SM, Walter I, Davies HTO. *Using Evidence - how research can inform public services*. Bristol: The Policy Press, 2007.
12. Nutley SM, Walter I, Davies HTO. *Using Evidence: How research can inform public services*. Bristol: The Policy Press, 2007.
13. Robert G, Greenhalgh T, MacFarlane F, et al. Adopting and assimilating new non-pharmaceutical technologies into health care: a systematic review. *Journal of Health Services Research & Policy* 2010;15(4):243-50.
14. Department of Health. Innovation Health and Wealth, Accelerating Adoption and Diffusion in the NHS. Leeds, West Yorkshire: Department of Health NHS Improvement & Efficiency Directorate Innovation and Service Improvement, 2011:36.
15. Damanpour F, Schneider M. Phases of the adoption of innovations in organisations: effects of environment, organisation and top managers. *British Journal of Management* 2006;17(3):21.
16. Rogers EM. *Diffusion of Innovations*. 5th ed. New York: Free Press, 2003.
17. Van de Ven AH, Polley DE, Garud Ra, et al. *The Innovation Journey*. Oxford, New York: Oxford University Press Inc, 1999.

18. Department of Health. Clean Safe Care: reducing infections and saving lives: Department of Health, 2008:40.
19. Craig A. U. MMD, Doshi J.A., Agarwal R., et al. Estimating the Proportion of Healthcare-Associated Infections That Are Reasonably Preventable and the Related Mortality and Costs. *Infection Control and Hospital Epidemiology* 2011;32(2):14.
20. World Health Organization. Prevention of hospital-acquired infections: A practical guide. In: Ducl G, Fabry, J. and Nicolle, L., editor. 2nd ed: World Health Organization, 2002.
21. Scott RD. The Direct Medical Costs of Healthcare-Associated Infections in U.S. Hospitals and the Benefits of Prevention: Centers for Disease Control and Prevention, 2009.
22. Klevens RM, Edwards, J.R., Richards, C.L., et al. Estimating Health Care-Associated Infections and Deaths in U.S. Hospitals, 2002. *Public Health Reports* 2007;122(2):6.
23. Smyth ETM, McIlvenny G, Enstone JE, et al. Four Country Healthcare Associated Infection Prevalence Survey 2006: overview of the results. *Journal of Hospital Infection* 2008;69(3):230-48.
24. Office for National Statistics. Health Statistics Quarterly 39. In: Statistics OfN, editor: Palgrave Macmillan, 2008.
25. Pratt RJ, Pellowe C, Loveday HP, et al. The epic Project: Developing National Evidence-based Guidelines for Preventing Healthcare associated Infections. *Journal of Hospital Infection* 2001;47(Supplement 1):S3-S4.
26. Kyratsis Y, Ahmad R, Holmes A. Understanding the Process of Innovation Adoption in 12 NHS trusts – technology selection, procurement and implementation to help reduce HCAs. In: Health Do, editor. London: Department of Health, 2010:331.
27. Eisenhardt KM. Building Theories from Case Study Research. *Academy of Management Review* 1989;14(4):532-50.
28. Fitzgerald L, Dopson S. Comparative Case Study Designs: their utility and development in organizational research. In: Buchanan D, Bryman A, editors. *The SAGE Handbook of Organizational Research Methods*: SAGE Publications Ltd, 2009:465-83.
29. Lee T. *Using Qualitative Methods In Organizational Research*: SAGE Publications, Inc 1998.
30. Meyer AD, Goes JB. Organizational Assimilation of Innovations: A Multilevel Contextual Analysis. *The Academy of Management Journal* 1988;31(4):897-923.
31. Brechin A, Siddell M. Ways of knowing. In: Gomm R, Davies C, editors. *Using evidence in health and social care*. Buckingham . Open University Press, 2000.
32. Bradley EH, Curry LA, Devers KJ. Qualitative Data Analysis for Health Services Research: Developing Taxonomy, Themes, and Theory. *Health Services Research* 2007;42(4):1758-72.
33. Atun RA, Kyratsis I, Jelic G, et al. Diffusion of complex health innovations—implementation of primary health care reforms in Bosnia and Herzegovina. *Health Policy and Planning* 2007;22(1):28-39.
34. Pope C, Ziebland S, Mays N. Analysing qualitative data. *BMJ* 2000;320(7227):114-16.
35. Sofaer S. Qualitative Methods: What Are They and Why Use Them? *Health Services Research* 1999;34(5):17.
36. Barbour RS. Checklists for improving rigour in qualitative research: a case of the tail wagging the dog? *BMJ* 2001;322(7294):1115-17.
37. Mays N, Pope C. Assessing quality in qualitative research. *BMJ* 2000;320(7226):50-52.
38. Barry CA, Britten N, Barber N, et al. Using Reflexivity to Optimize Teamwork in Qualitative Research. *Qualitative Health Research* 1999;9(1):26-44.
39. Ferlie E, Fitzgerald L, Woods M. Getting Evidence into Clinical Practice: An Organisational Behaviour Perspective *Journal of Health Services Research Policy* 2000;5(2):6.
40. Dopson S, FitzGerald L, Ferlie E, et al. No Magic Targets! Changing Clinical Practice To Become More Evidence Based. *Health Care Management Review* 2002;27(3):35-47.

- 1
- 2
- 3
- 4 41. Denis J-L, Hébert Y, Langley A, et al. Explaining Diffusion Patterns for Complex Health Care
- 5 Innovations. *Health Care Management Review* 2002;27(3):60-73.
- 6 42. Gladwin J, Dixon R, Wilson T. Rejection of an innovation: health information management training
- 7 materials in east Africa. *Health Policy and Planning* 2002;17(4):354-61.
- 8 43. Fitzgerald L, Ferlie E, Wood M, et al. Interlocking Interactions, the Diffusion of Innovations in Health
- 9 Care. *Human Relations* 2002;55(12):1429-49.
- 10 44. Halladay M, Bero L. Implementing Evidence-Based Practice in Health Care. *Public Money &*
- 11 *Management* 2000;20:43-50.
- 12 45. Sheikh A, Cornford T, Barber N, et al. Implementation and adoption of nationwide electronic health
- 13 records in secondary care in England: final qualitative results from prospective national
- 14 evaluation in "early adopter" hospitals. *BMJ* 2011;343.
- 15 46. Meads G, Ashcroft J, Barr H, et al. *The case for interprofessional collaboration in health and social*
- 16 *care*: Wiley-Blackwell, 2005.
- 17 47. Kyratsis Y, Ahmad R, Holmes A. Making sense of evidence in management decisions - the role of
- 18 research-based knowledge on innovation adoption and implementation in healthcare: Study
- 19 Protocol: National Institute for Health Research - Service Delivery and Organisation Programme,
- 20 19 September 2011.
- 21
- 22
- 23
- 24
- 25

## 26 **Governance and ethics**

27

28

29 Ethical approval was not required for the study under NHS research governance arrangements (letter

30 dated 23 April 2009 by Hammersmith and Queen Charlotte's & Chelsea Research Ethics Committee). The

31 research was classed as service evaluation by the chairman of the Committee. Access to the

32 participating trusts was via DH in the first instance through an introductory letter. The trusts were then

33 approached by a member of our research team. The project lead and IPC teams in each trust further

34 facilitated access to those involved in the decision making, procurement and implementation of the

35 selected technologies. Prior informed consent to join the study was obtained in writing by participating

36 individuals. Author 1 and author 2 conducted the interviews, both experienced qualitative researchers

37 with no prior relationship with the informants. Interviews were guided by a topic guide. All interviews,

38 but one, were audio-recorded. Audio recorded interviews were transcribed verbatim by professional

39 transcribers, and then checked by the researchers for accuracy. Primary data were anonymised and

40 stored securely on password protected computers prior to processing.

41

42

43

44

45

46

47

48

49

50

51

52

53

54

55

56

57

58

59

60



## Acknowledgments

We would like to thank the participating hospitals for supporting this work and we thankfully acknowledge all respondents who participated in the study and kindly gave their time. We are also grateful to Sue Smalley from the Department of Health for project support and constructive feedback and Professor Charles Vincent from Imperial College Centre for Patient Safety and Service Quality for reviewing the draft manuscript. The authors acknowledge the UKCRC who fund the National Centre for Infection Prevention and Management and the National Institute for Health Research Biomedical Research Centre at Imperial College London.

**Funding:** This study is an independent study which was funded by the Department of Health (DH). The DH influenced the execution of the study as follows: The Award from DH came with an agreement in principle with the trusts to participate in the study. Access to the participating trusts in the first instance was via DH by means of an introductory letter sent by Sue Smalley from DH. The trusts were then approached by a member of our research team. The researchers did provide update to DH on progress regards access and spend on technologies. The DH had no other interference in the design, execution and interpretation of findings.

## Copyright for publication

The Corresponding Author Dr Yiannis Kyratsis has the right to grant on behalf of all authors and does grant on behalf of all authors, an exclusive licence (or non-exclusive for UK Crown Employees) on a worldwide basis to the BMJ Publishing Group Ltd, and its Licensees to permit this article (if accepted) to be published in BMJ Open and any other BMJPG products and to exploit all subsidiary rights, as set out in our licence.



**No competing interests**

All authors have completed the Unified Competing Interest form at [www.icmje.org/coi\\_disclosure.pdf](http://www.icmje.org/coi_disclosure.pdf) (available on request from the corresponding author) and declare: no support from any organisation for the submitted work; no financial relationships with any organisations that might have an interest in the submitted work in the previous 3 years; no other relationships or activities that could appear to have influenced the submitted work.

**Details of contributors**

YK and RA conceived the idea for the paper, collected and systematically analysed all data. All three authors interpreted the data. YK designed the initial study and drafted the article, RA contributed to study design and all three authors revised it critically for important intellectual content. All three authors approve the content of the manuscript submitted.
